# Supplementary material for: Mechanistically Coupled PK (MCPK) Model to Describe Enzyme Induction and Occupancy Dependent DDI of Dabrafenib Metabolism
Source: MDPI journal article supplement (doi:10.3390/pharmaceutics14020310), 2022-01-28

# Supplemental Information S2: Mechanistically Coupled PK (MCPK) model to describe enzyme induction and occupancy dependent DDI of dabrafenib metabolism

Marco Albrecht<sup>1,2</sup>, Yuri Kogan<sup>3</sup>, Dagmar Kulms<sup>4</sup>, and Thomas Sauter<sup>5</sup>

<sup>1</sup>Université du Luxembourg; Systems Biology Group; 4367 Belvaux; Luxembourg;  
Email: marco.albrecht@posteo.eu

<sup>2</sup>esqLABS GmbH; 26683 Saterland; Germany; Email: marco.albrecht@esqlabs.com

<sup>3</sup>Institute for Medical Biomathematics (IMBM); 60991 Bnei Atarot; Israel; Email:  
yuri@imbm.com

<sup>4</sup>Technical University of Dresden; Experimental Dermatology; 01307 Dresden;  
Germany; Tel.: +49 (0)351 458-18973 ; Email: dagmar.kulms@uniklinikum-dresden.de

<sup>5</sup>Université du Luxembourg; Systems Biology Group; 4367 Belvaux; Luxembourg; Tel.:  
(+352) 46 66 44 6296; Email: thomas.sauter@uni.lu

## Spheroid Image Data used for Paper Figure 6

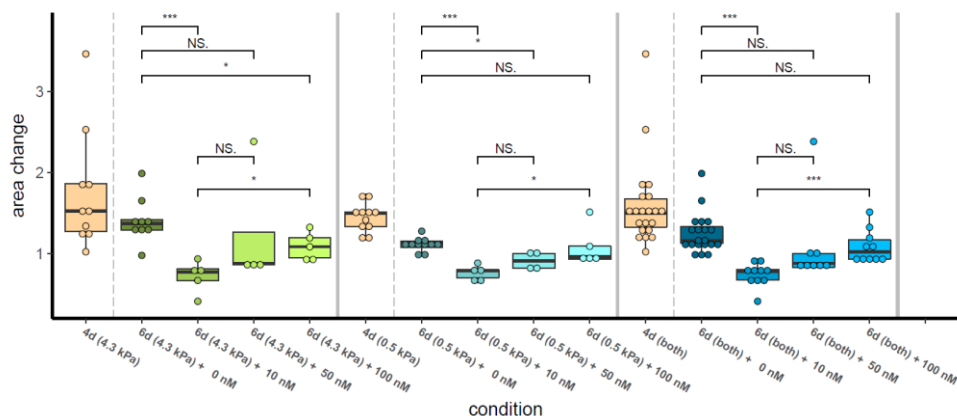

## Legend

CD: Cell degradable gel

R1-4: Biological Replicate Series 1 to 4.

XCD2/6: X is one spheroid of a Biological Replicate Series

451LU: Metastatic Melanoma Cell Line with **green** fluorescent protein

PI: Propidium iodide as a **red** cell death marker at day 6

DMSO: Dimethyl sulphoxide.

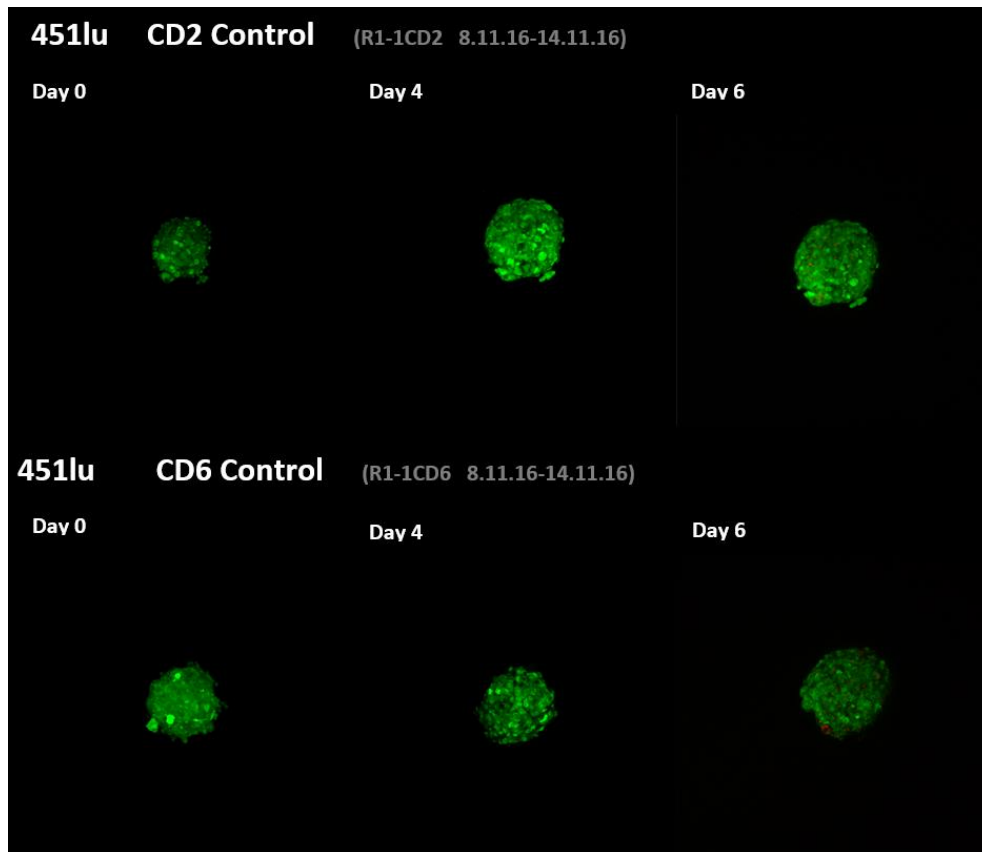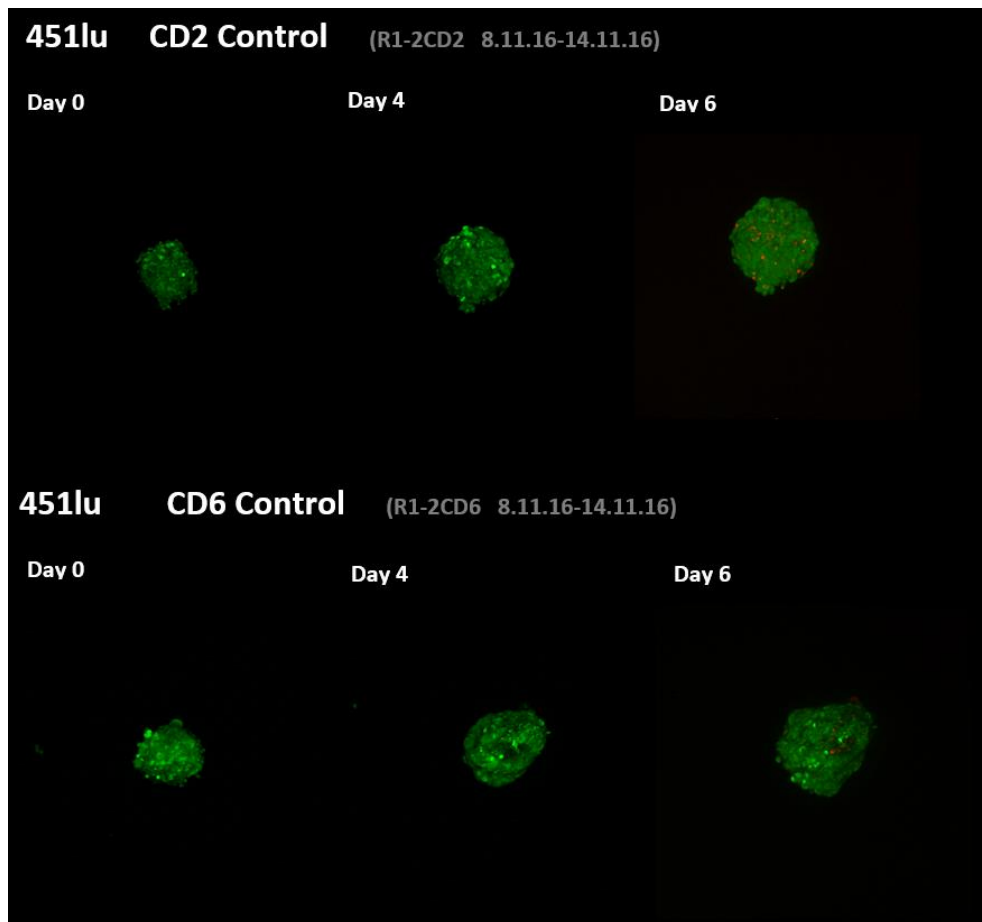

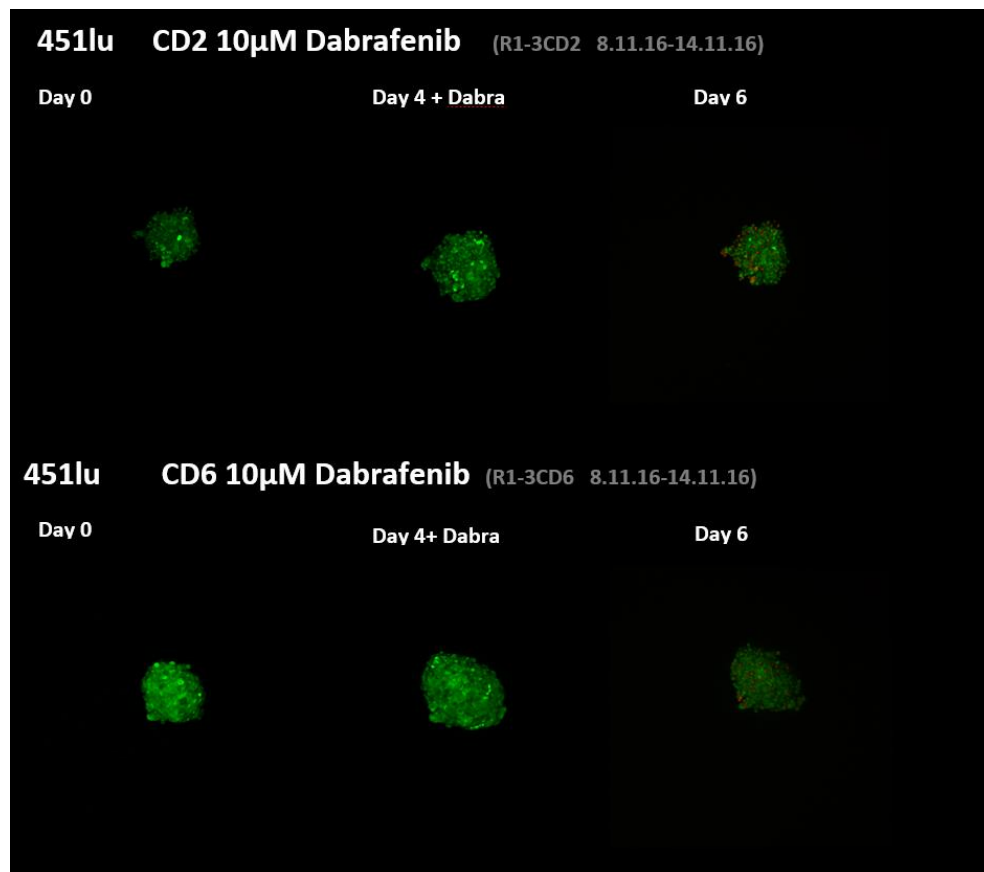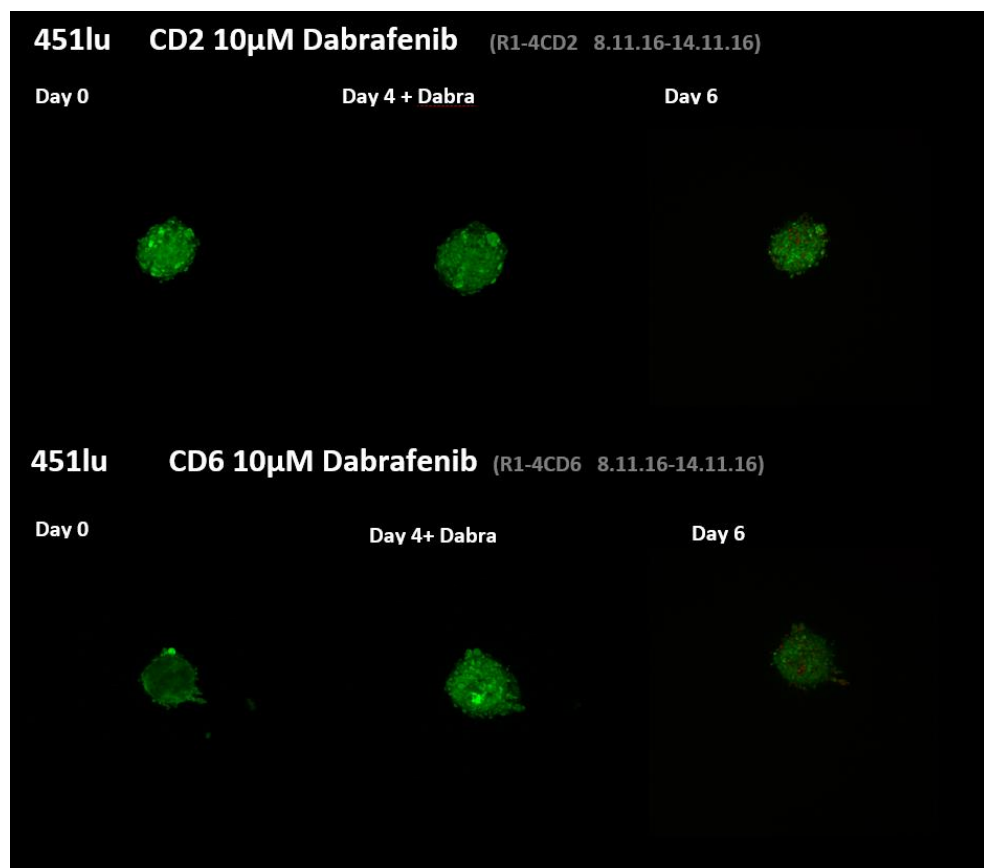

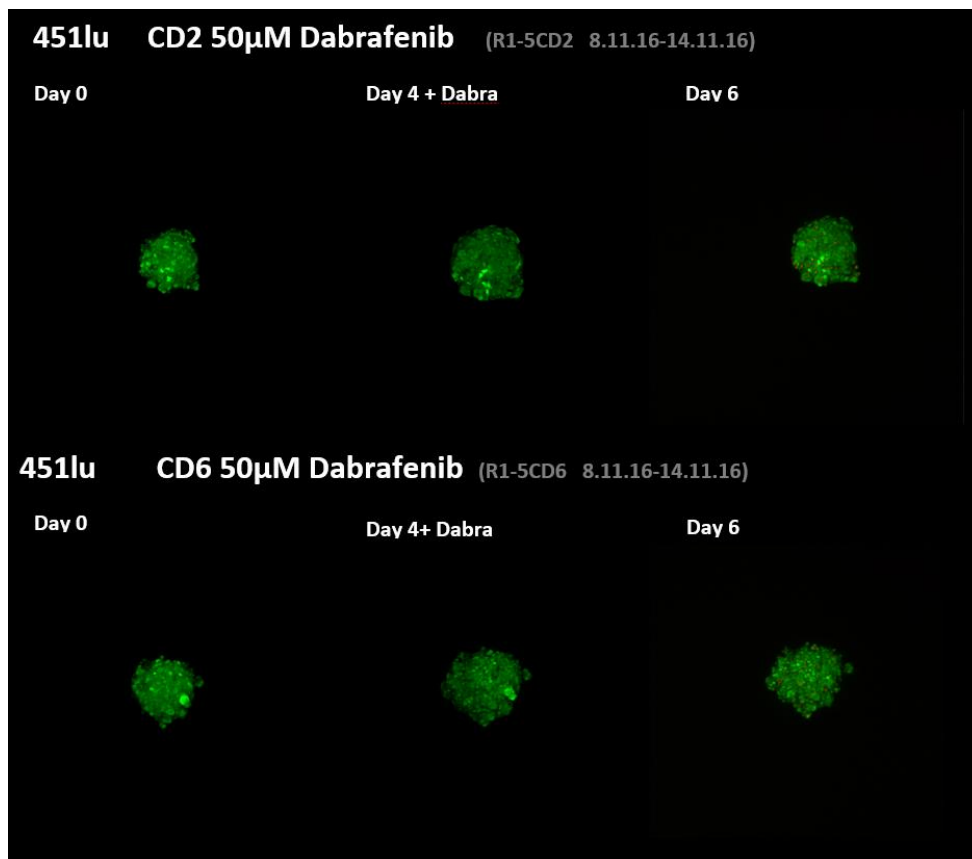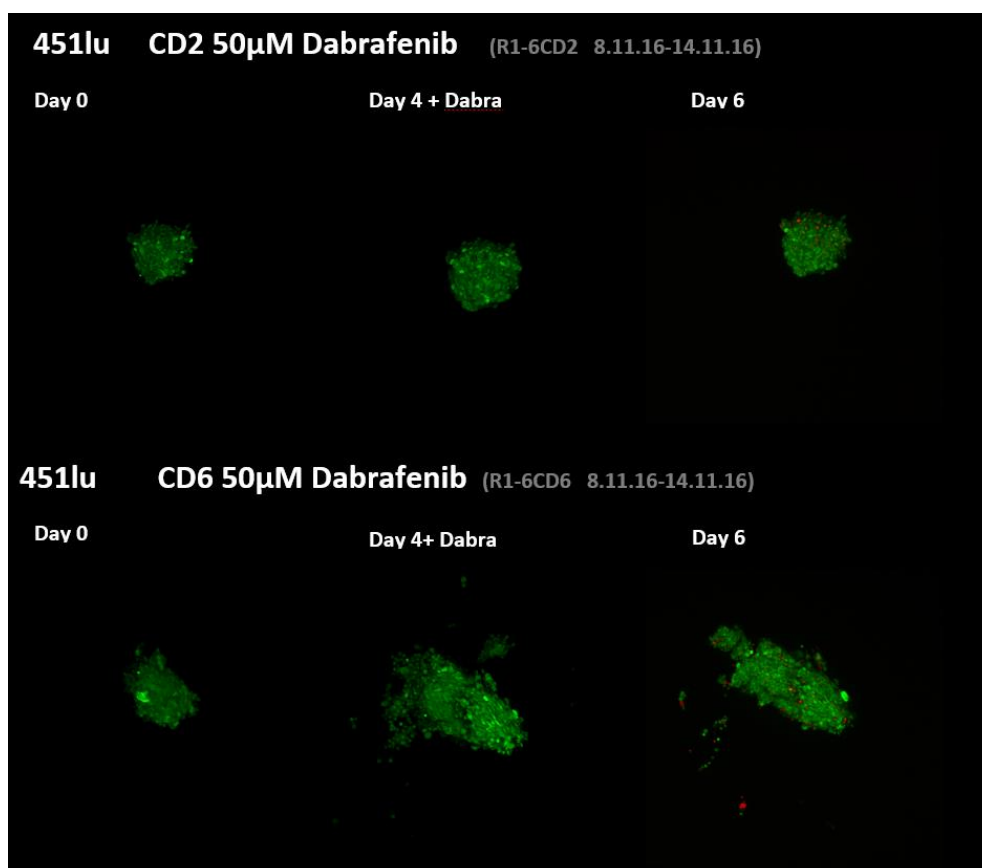

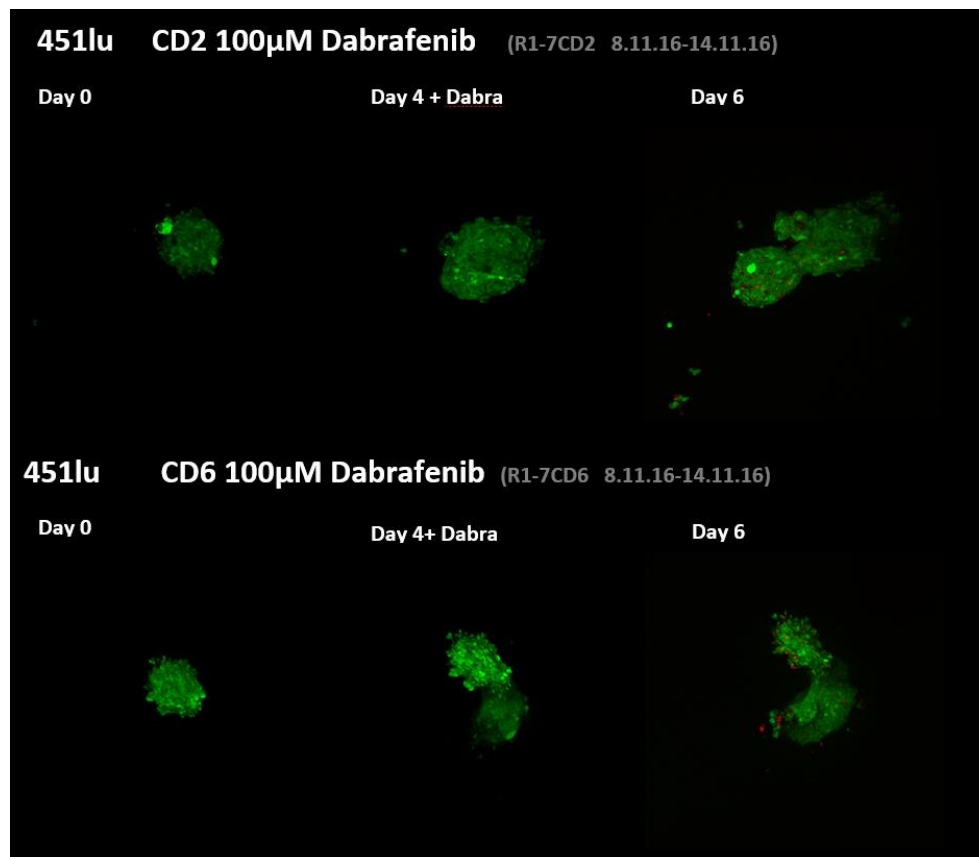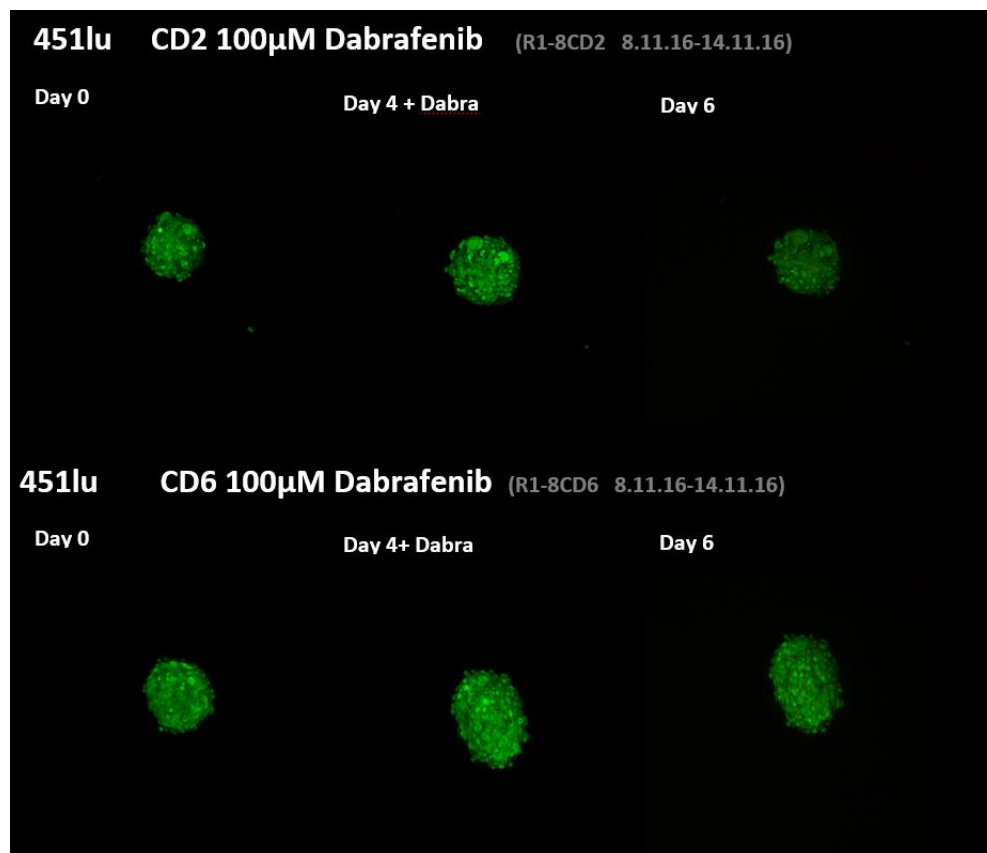

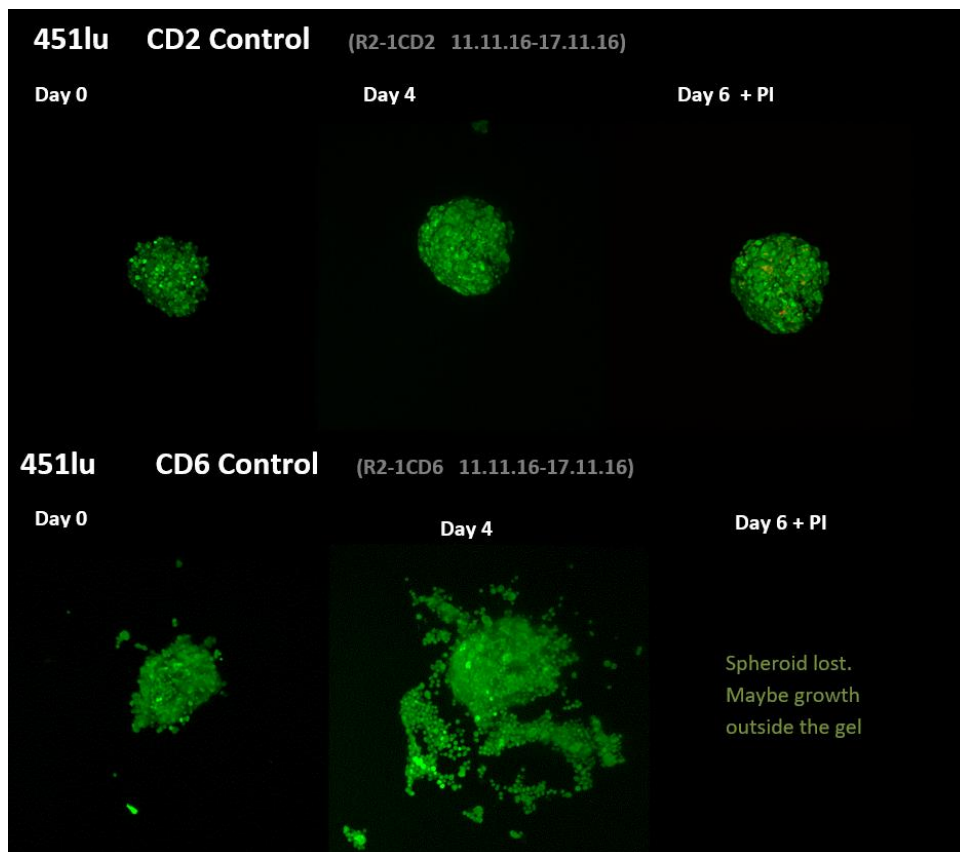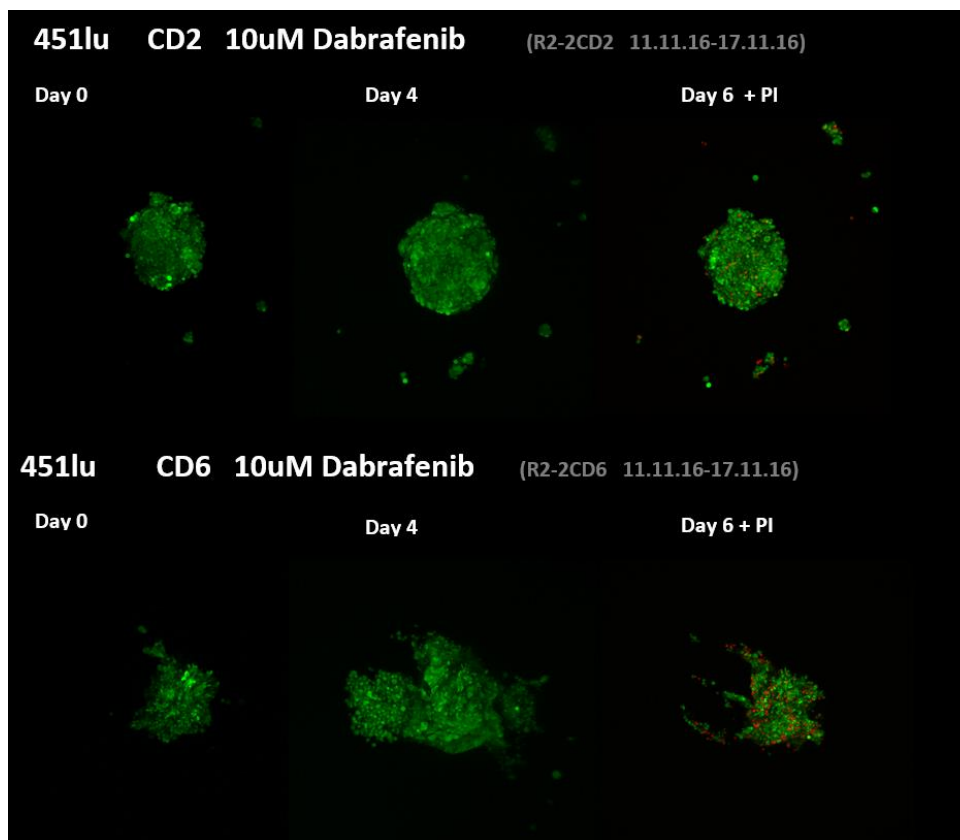

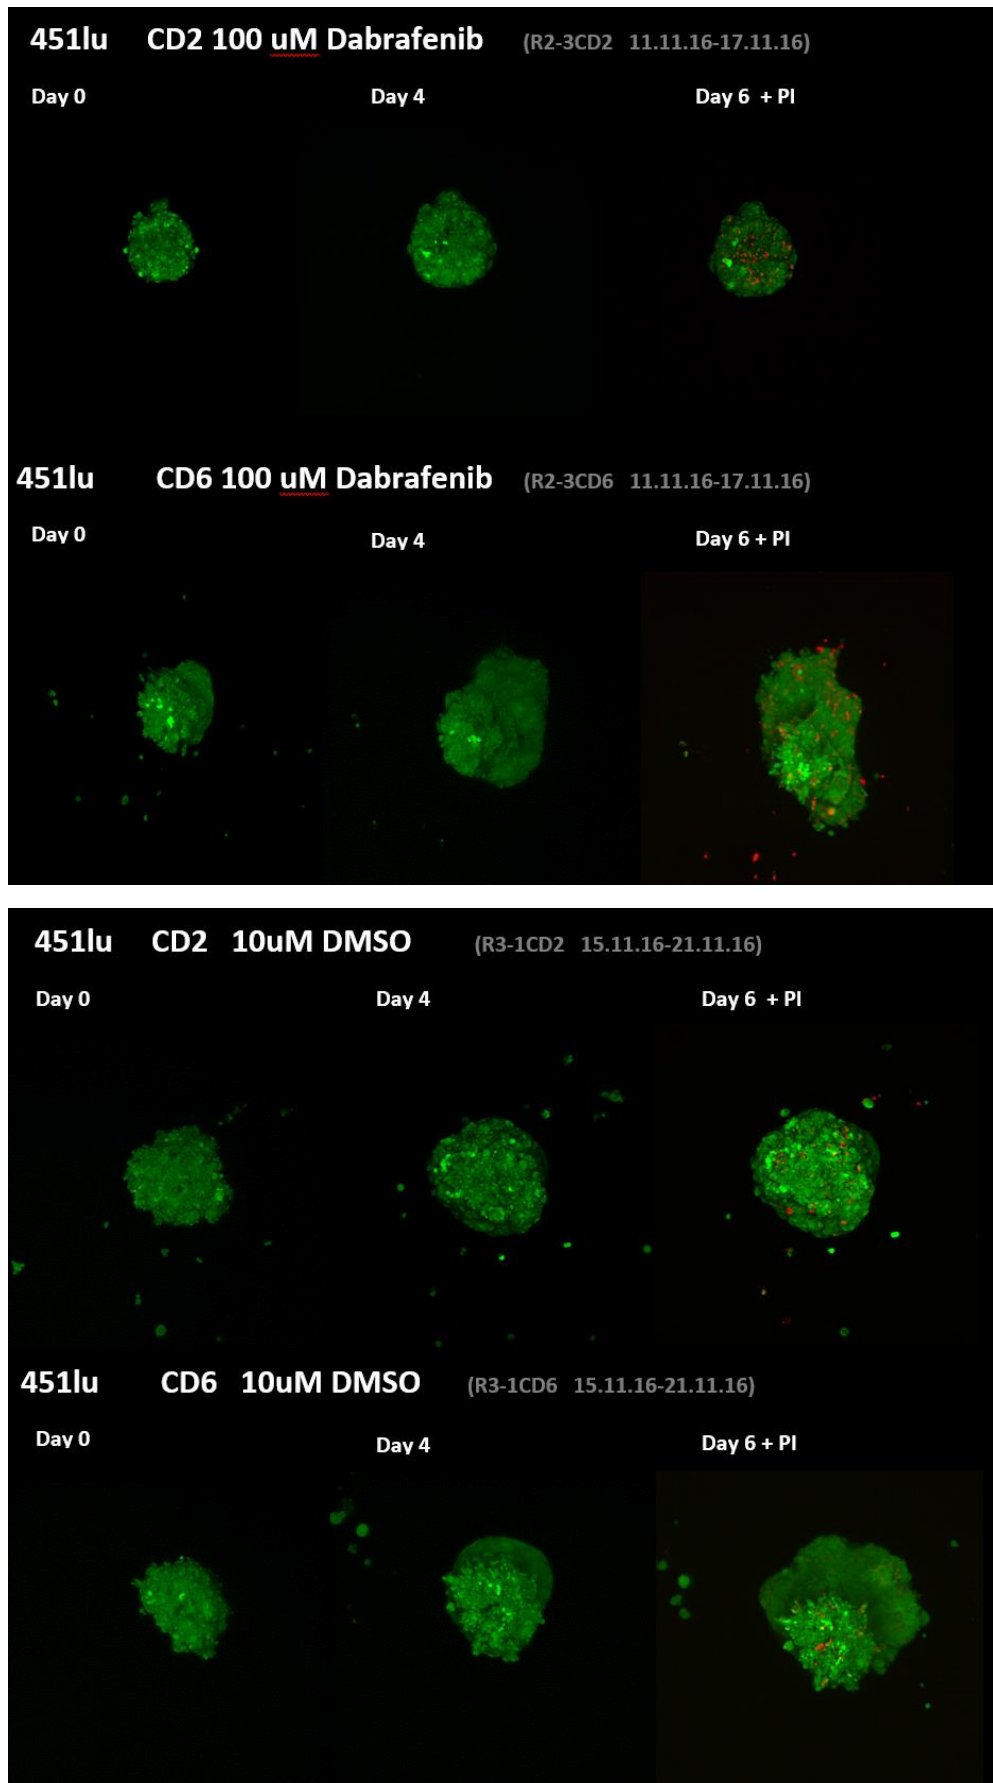

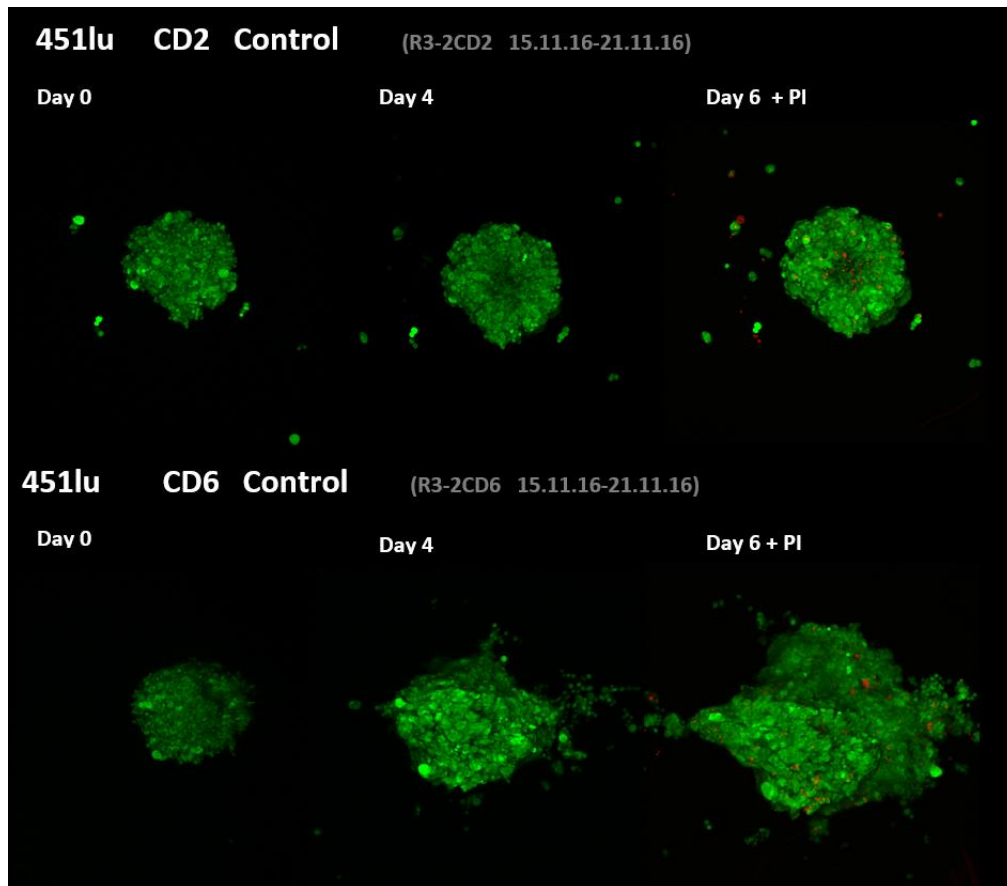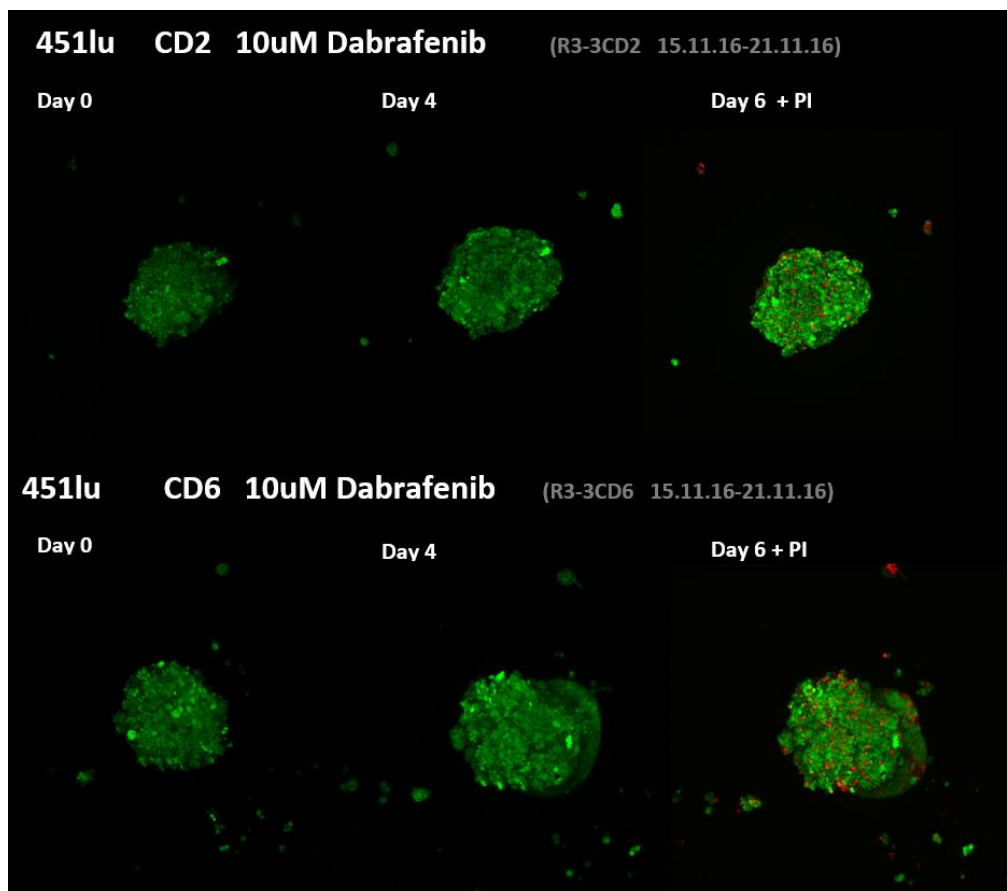



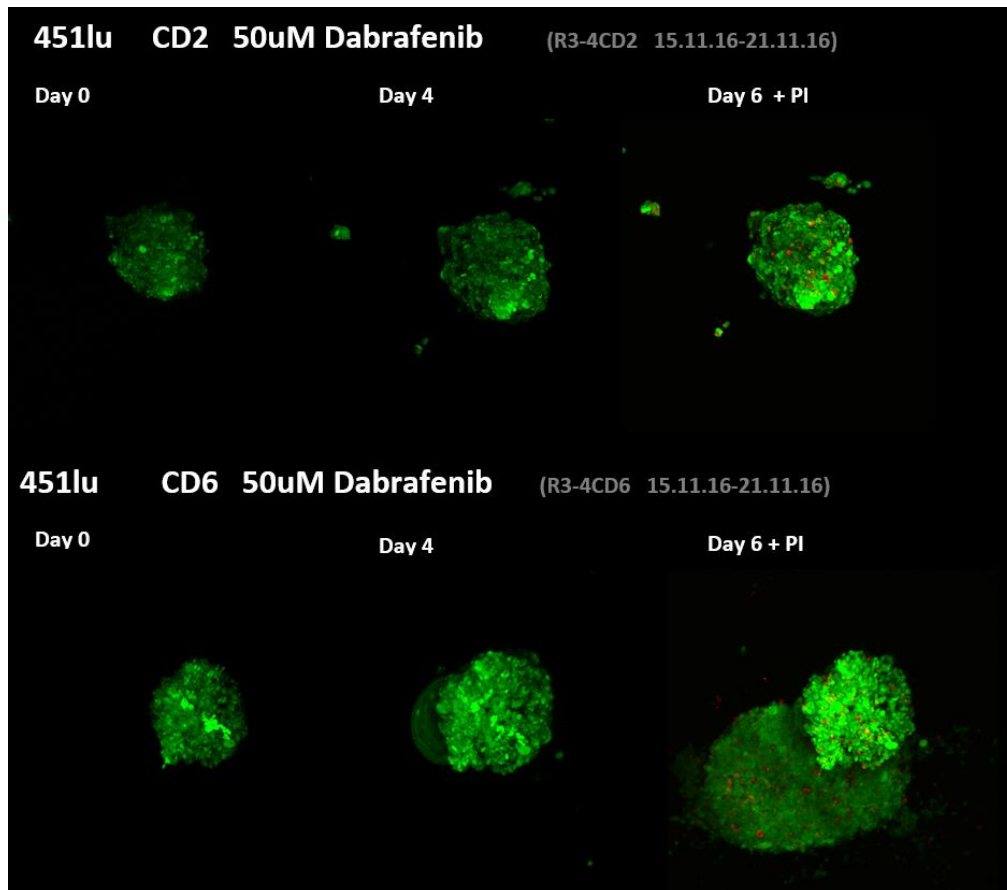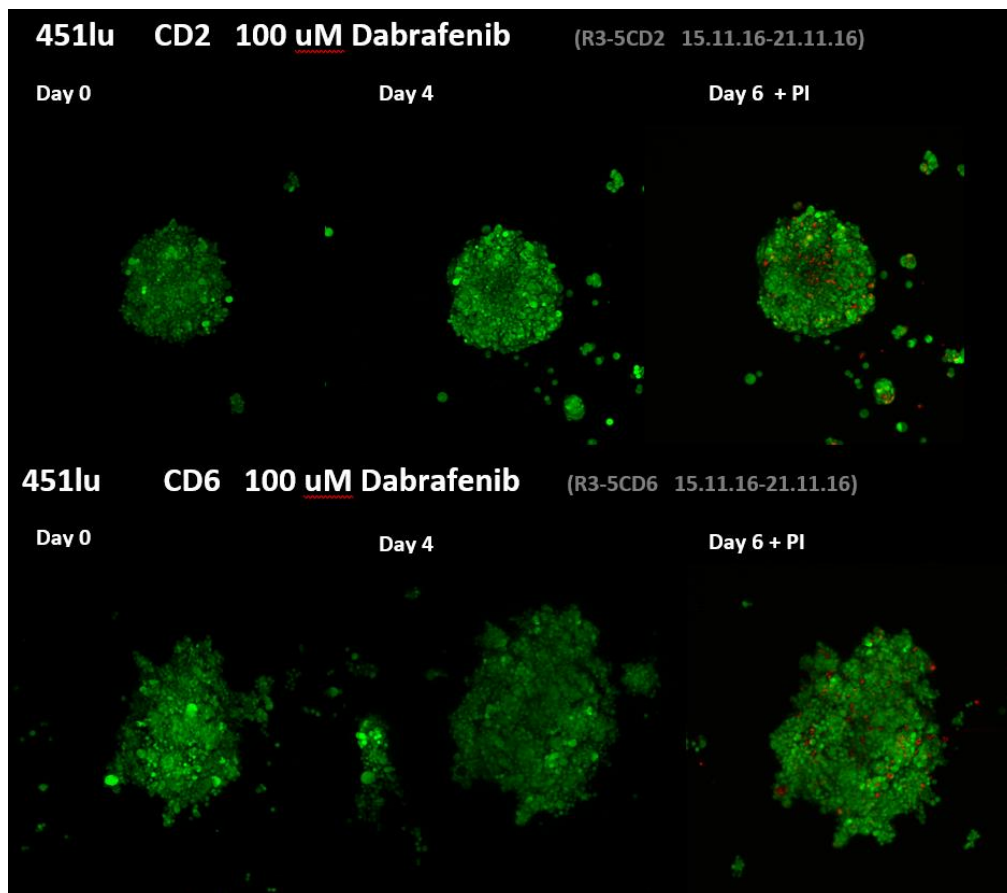

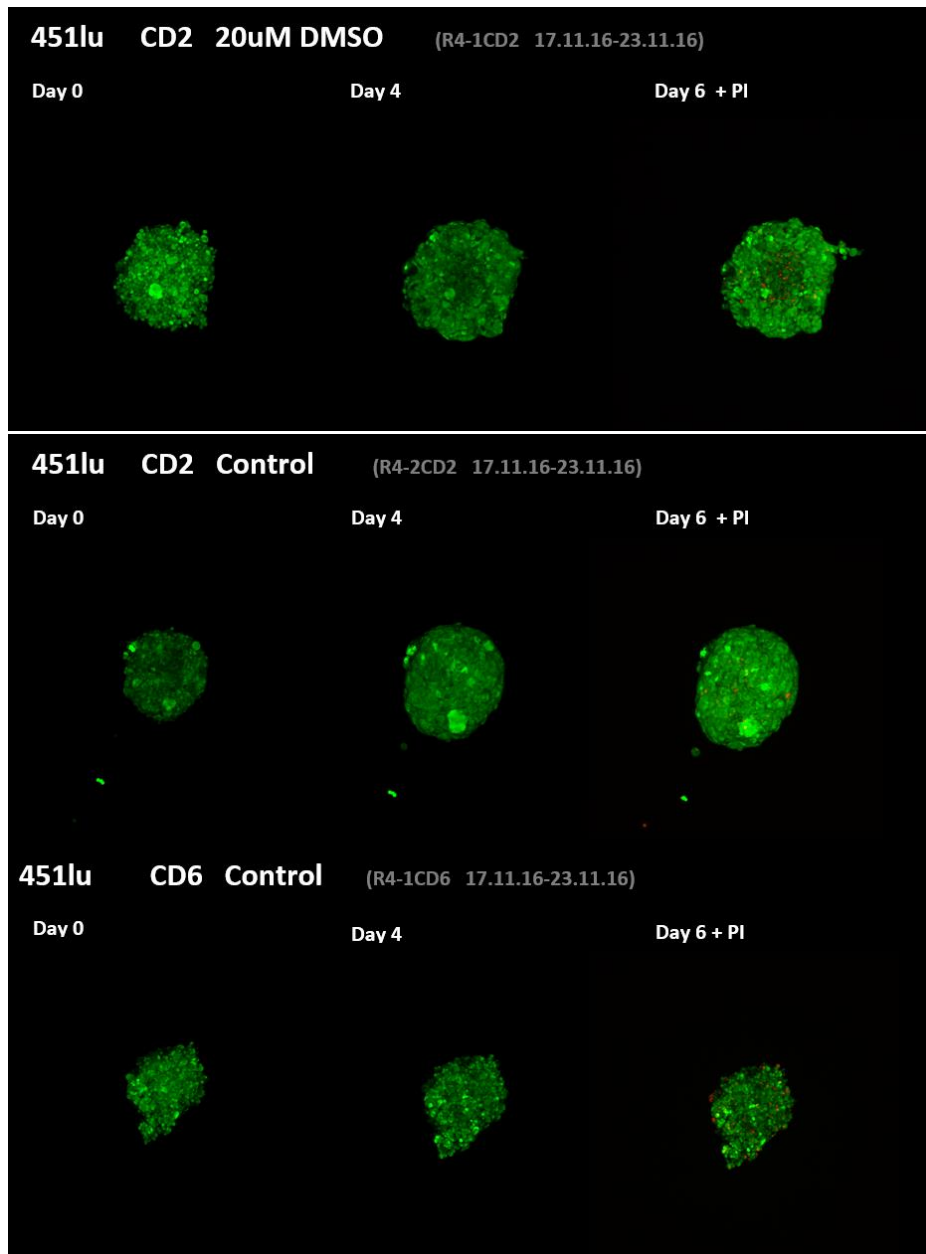

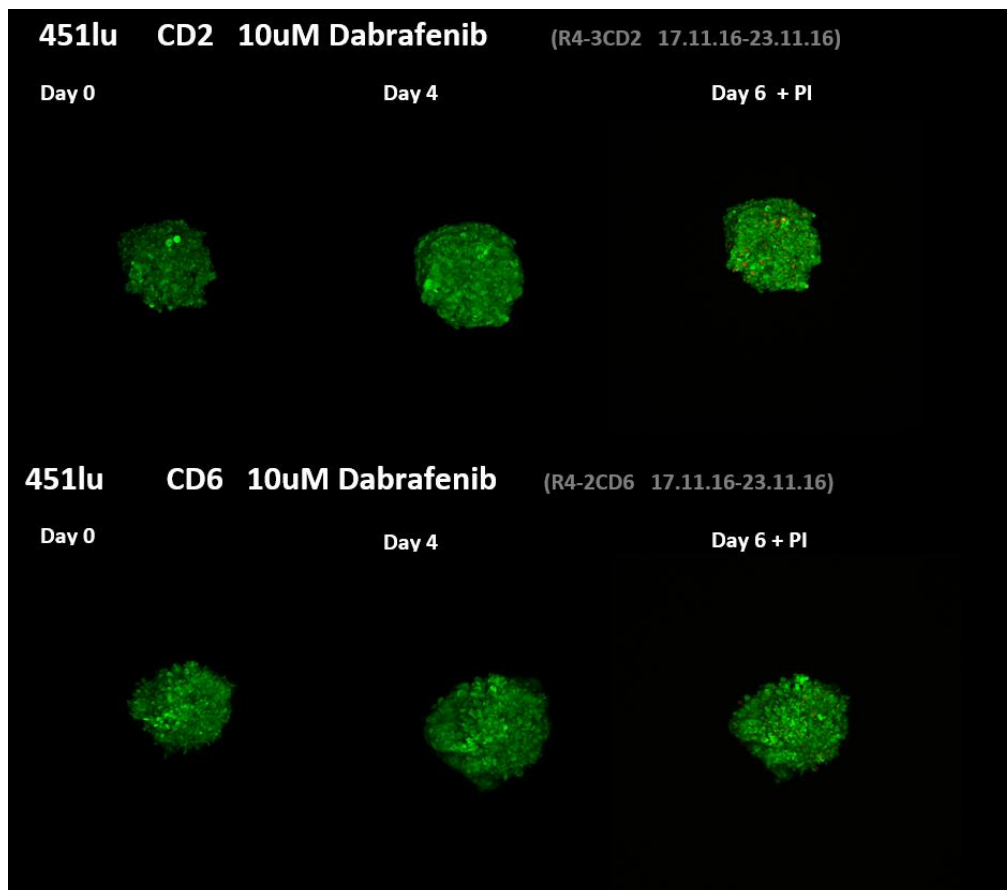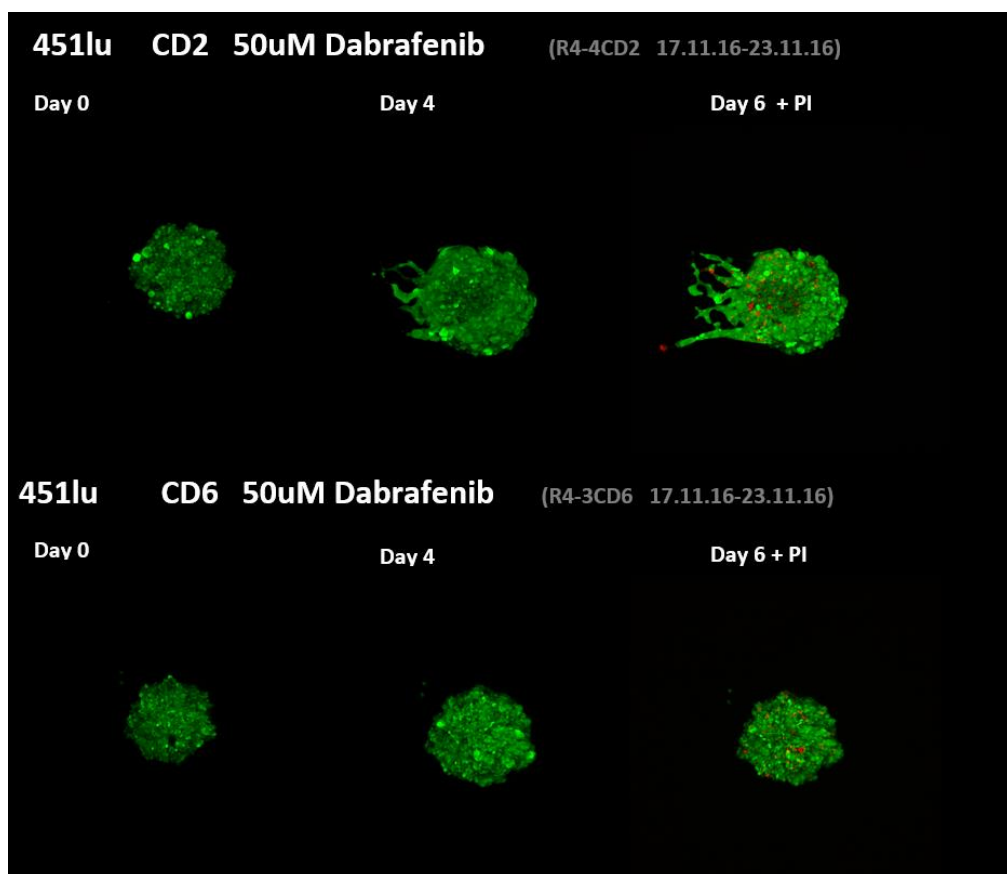

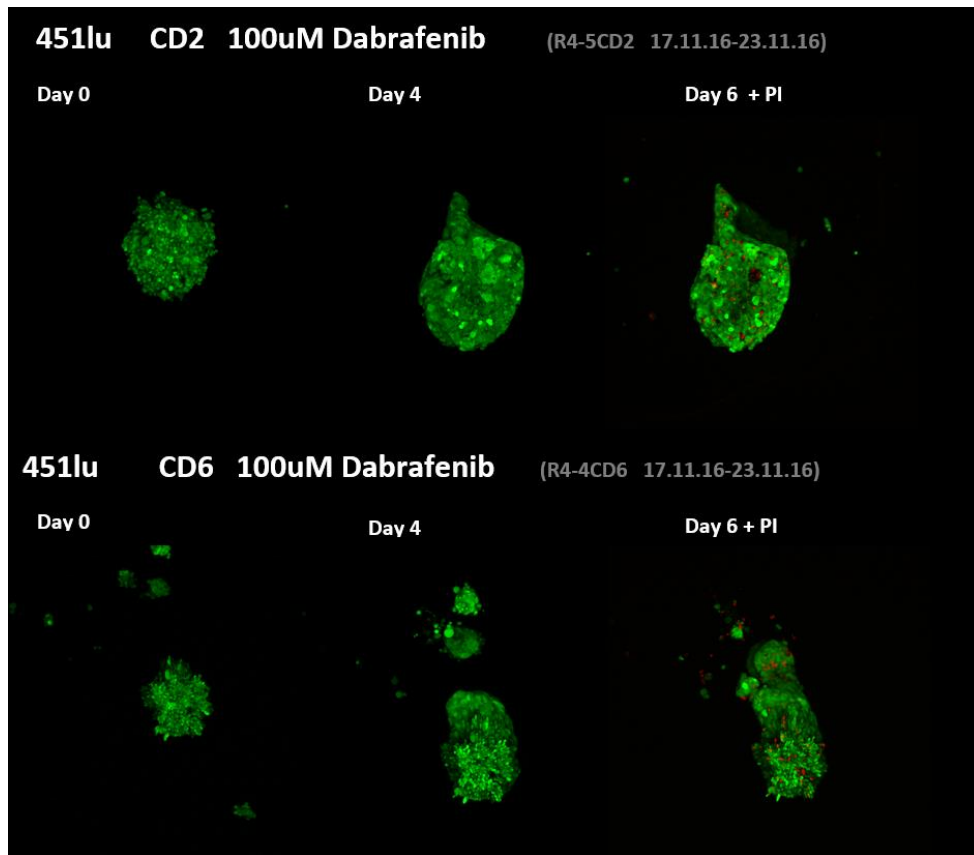

Supplement: s1 [file s1]
