# Supplementary material for: Mechanistically Coupled PK (MCPK) Model to Describe Enzyme Induction and Occupancy Dependent DDI of Dabrafenib Metabolism
Source: MDPI journal article supplement (doi:10.3390/pharmaceutics14020310), 2022-01-28

# Supplemental Information S4: Mechanistically Coupled PK (MCPK) model to describe enzyme induction and occupancy dependent DDI of dabrafenib metabolism

Marco Albrecht<sup>1,2</sup>, Yuri Kogan<sup>3</sup>, Dagmar Kulms<sup>4</sup>, and Thomas Sauter<sup>5</sup>

<sup>1</sup>*Université du Luxembourg; Systems Biology Group; 4367 Belvaux; Luxembourg; Email: marco.albrecht@posteo.eu*

<sup>2</sup>*esqLABS GmbH; 26683 Saterland; Germany; Email: marco.albrecht@esqlabs.com*

<sup>3</sup>*Institute for Medical Biomathematics (IMBM); 60991 Bnei Atarot; Israel; Email: yuri@imbm.com*

<sup>4</sup>*Technical University of Dresden; Experimental Dermatology; 01307 Dresden; Germany; Tel.: +49 (0)351 458-18973 ; Email: dagmar.kulms@uniklinikum-dresden.de*

<sup>5</sup>*Université du Luxembourg; Systems Biology Group; 4367 Belvaux; Luxembourg; Tel.: (+352) 46 66 44 6296; Email: thomas.sauter@uni.lu*

## Spheroid Image Data of A375 Spheroid Growth

|                                                           |    |
|-----------------------------------------------------------|----|
| Spheroid Image Data of A375 Spheroid Growth.....          | 1  |
| Legend.....                                               | 1  |
| A375– First Iteration .....                               | 2  |
| A375– Second Iteration (with or without Fibronectin)..... | 6  |
| A375– Third Iteration.....                                | 19 |

## Legend

CD: Gel with cell degradable linker  
PEG: Gel with non-degradable polyethylene glycol linker  
R1-3: Biological Replicate 1 to 3.  
A375: Metastatic Melanoma Cell Line with **green** fluorescent protein  
PI: Propidium iodide as a **red** cell death marker at last day

## A375– First Iteration

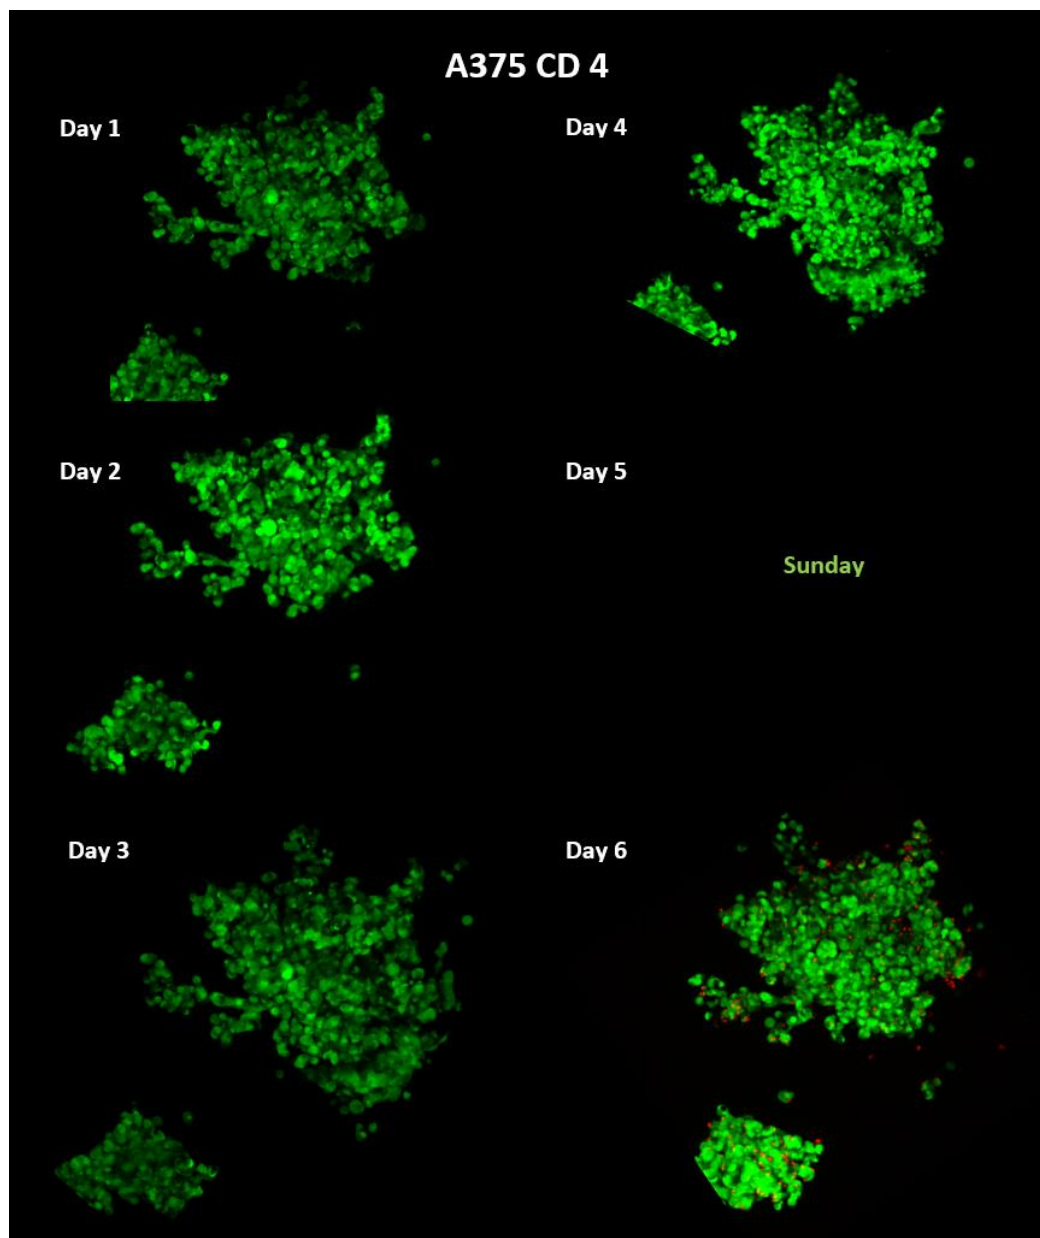

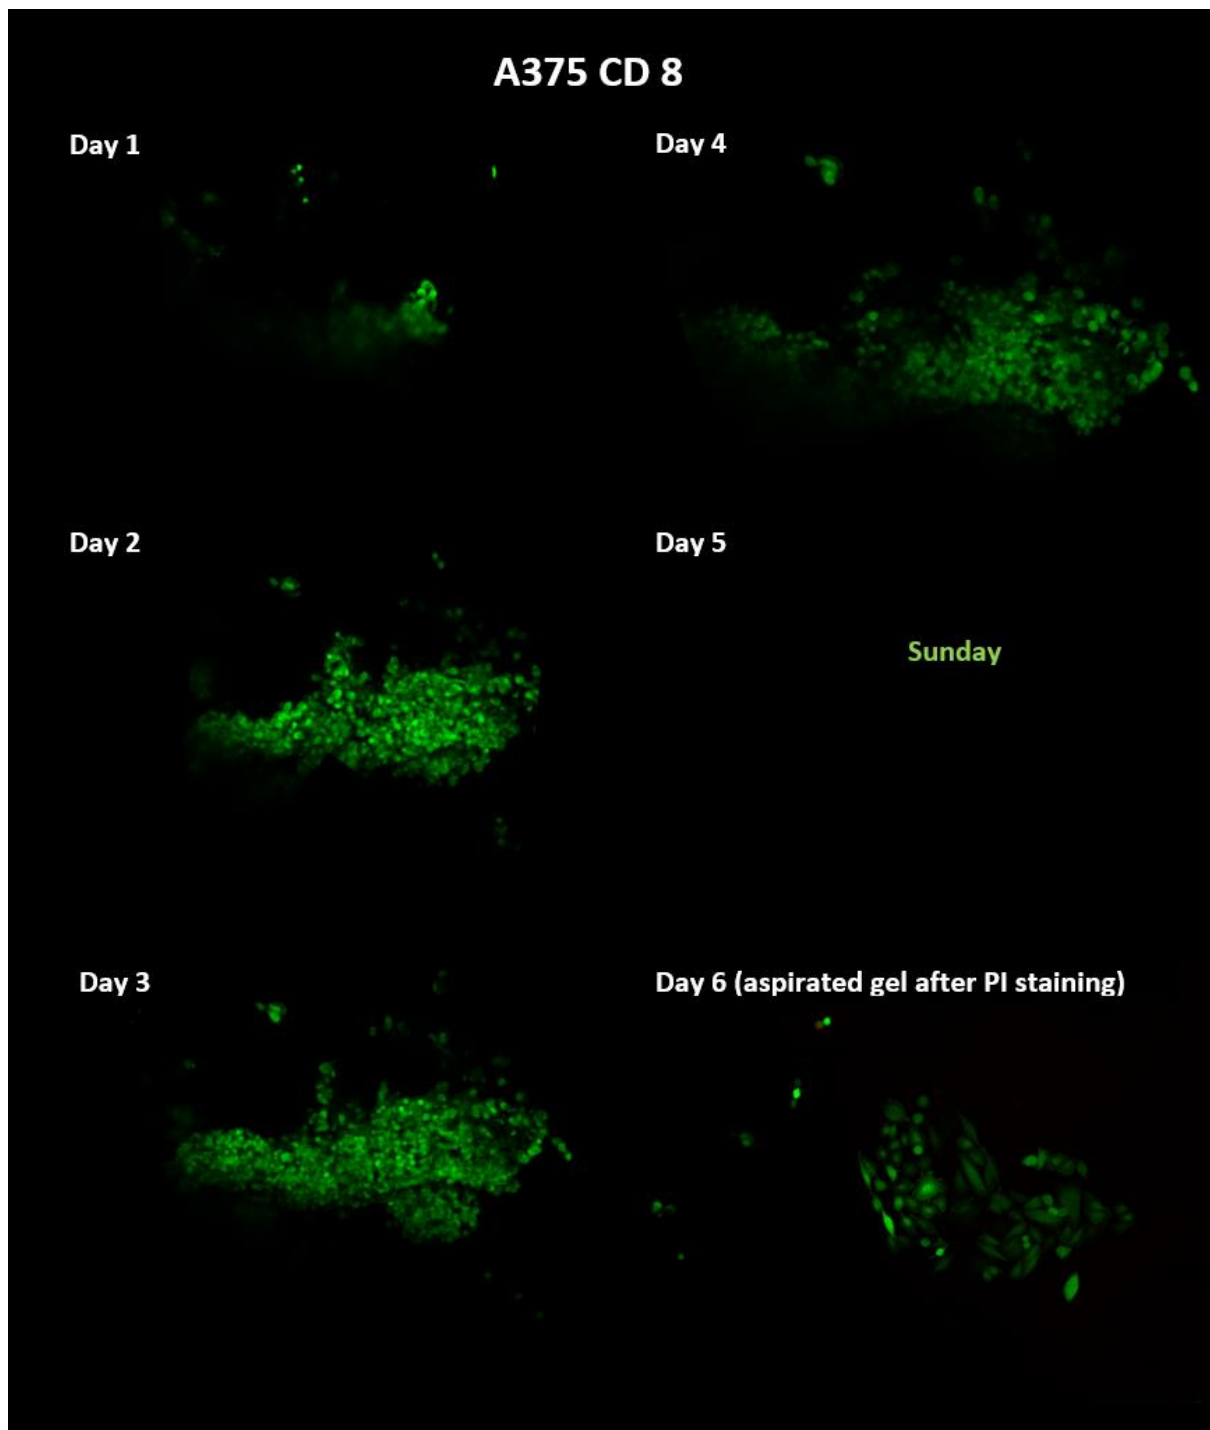

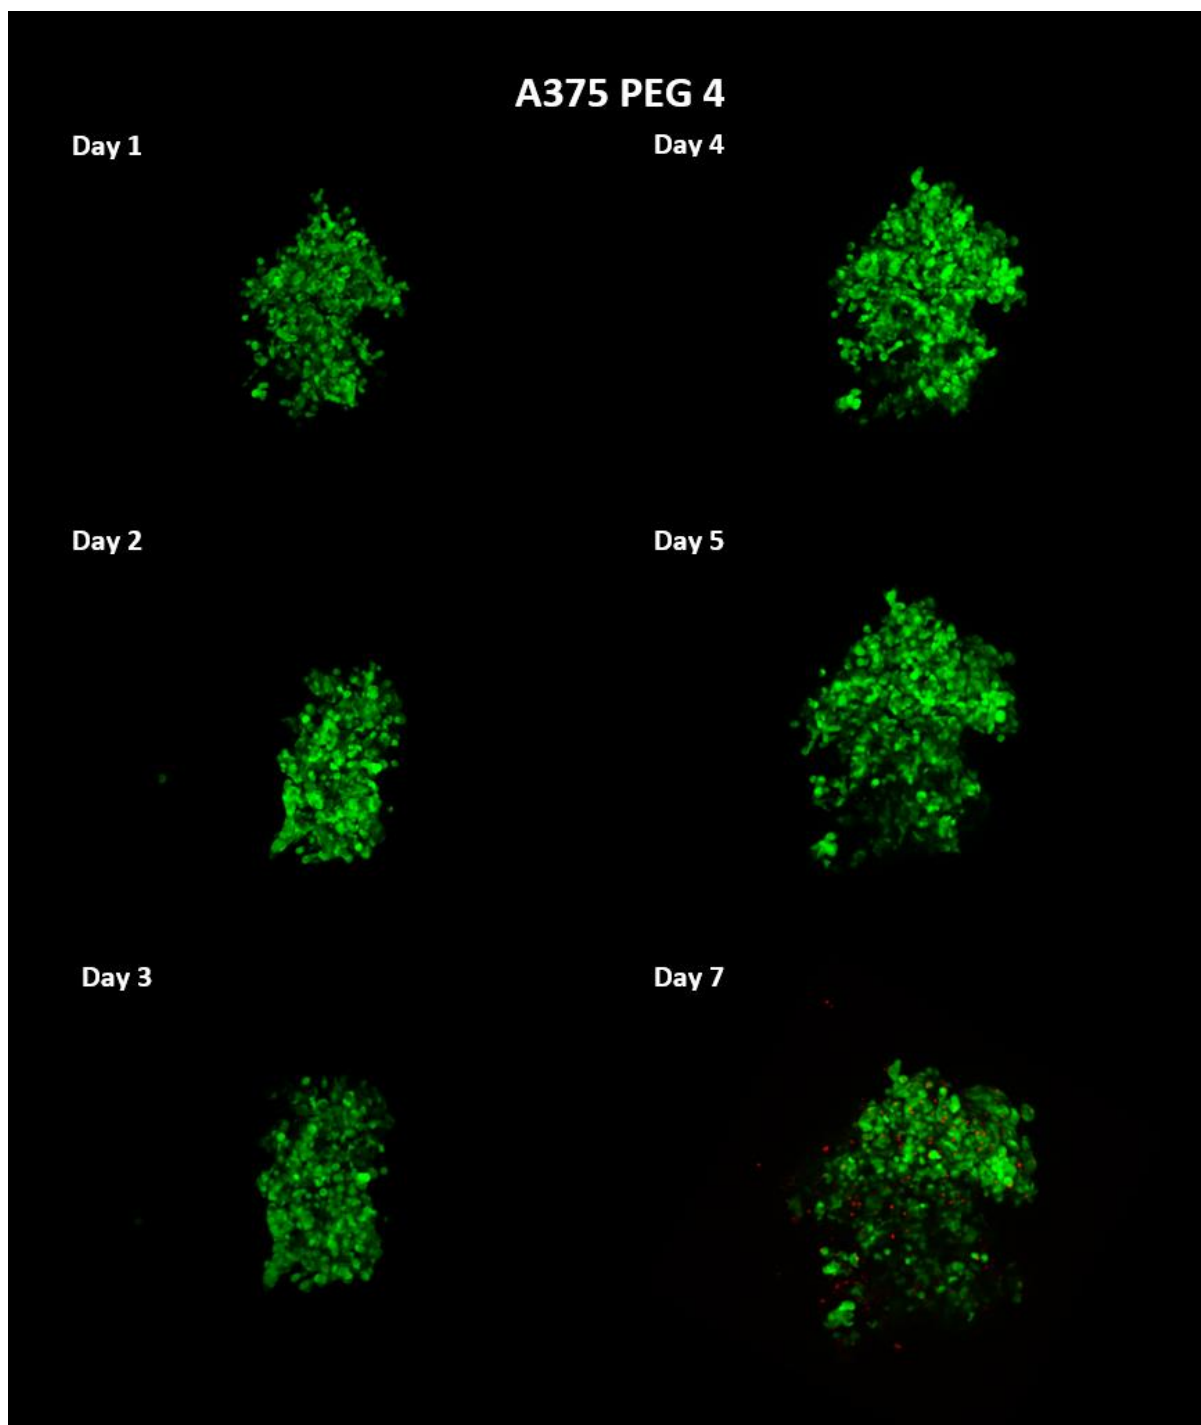

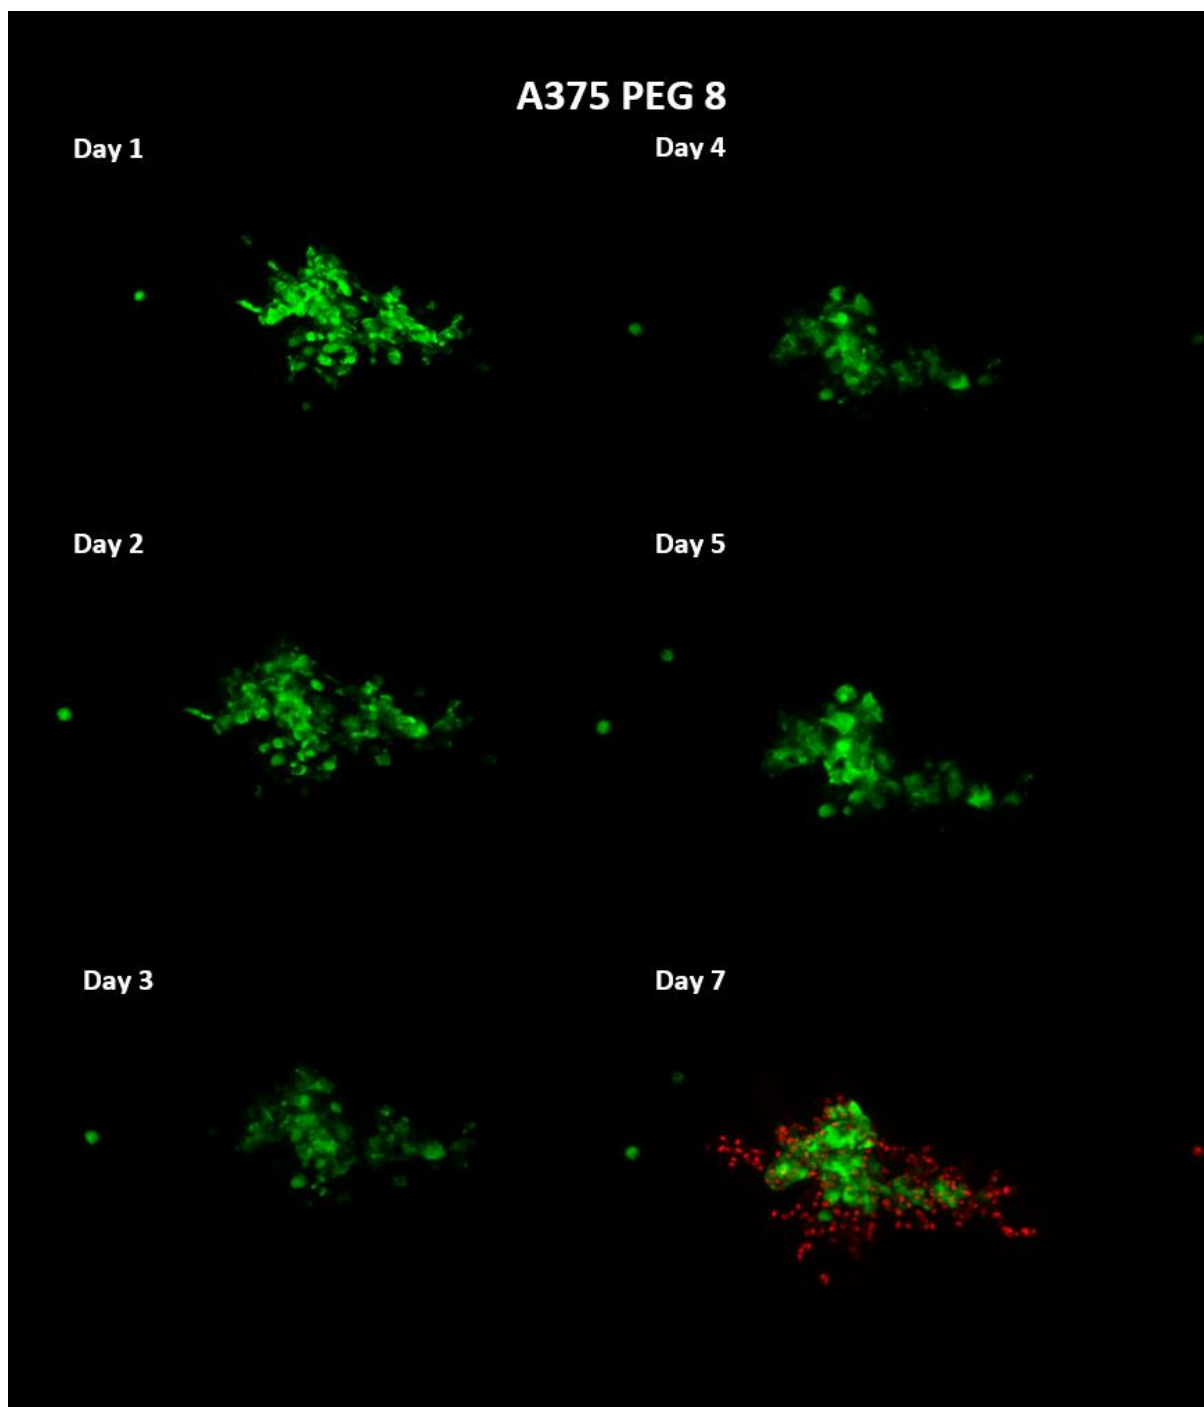

## A375– Second Iteration (with or without Fibronectin)

| <b>2</b> | <b>2 without<br/>Fibronectin</b> | <b>4</b> | <b>4 without<br/>Fibronectin</b> | <b>6</b> | <b>8</b> | Ingredients               | PEG Link  | CD-Link   |
|----------|----------------------------------|----------|----------------------------------|----------|----------|---------------------------|-----------|-----------|
| 14.8     | 16.6                             | 10.7     | 12.5                             | 5.7      | 0.7      | Water                     | 539       | 539       |
| 2.4      | 2.4                              | 2.5      | 2.5                              | 2.5      | 2.5      | 10xCB PH 7.2              | 580       | 485       |
| 2        | 2                                | 4        | 4                                | 6        | 8        | Thiol-reactive<br>polymer | 544       | 544       |
| 1.8      | 0                                | 1.8      | 0                                | 1.8      | 1.8      | Fibronectin               | SLBP0436V | SLBP0436V |
| 6        | 6                                | 5        | 5                                | 5        | 5        | Cell suspension           |           |           |
| 3        | 3                                | 6        | 6                                | 9        | 12       | CD or PEG Link            | 565       | 553       |
| 30       | 30                               | 30       | 30                               | 30       | 30       |                           |           |           |

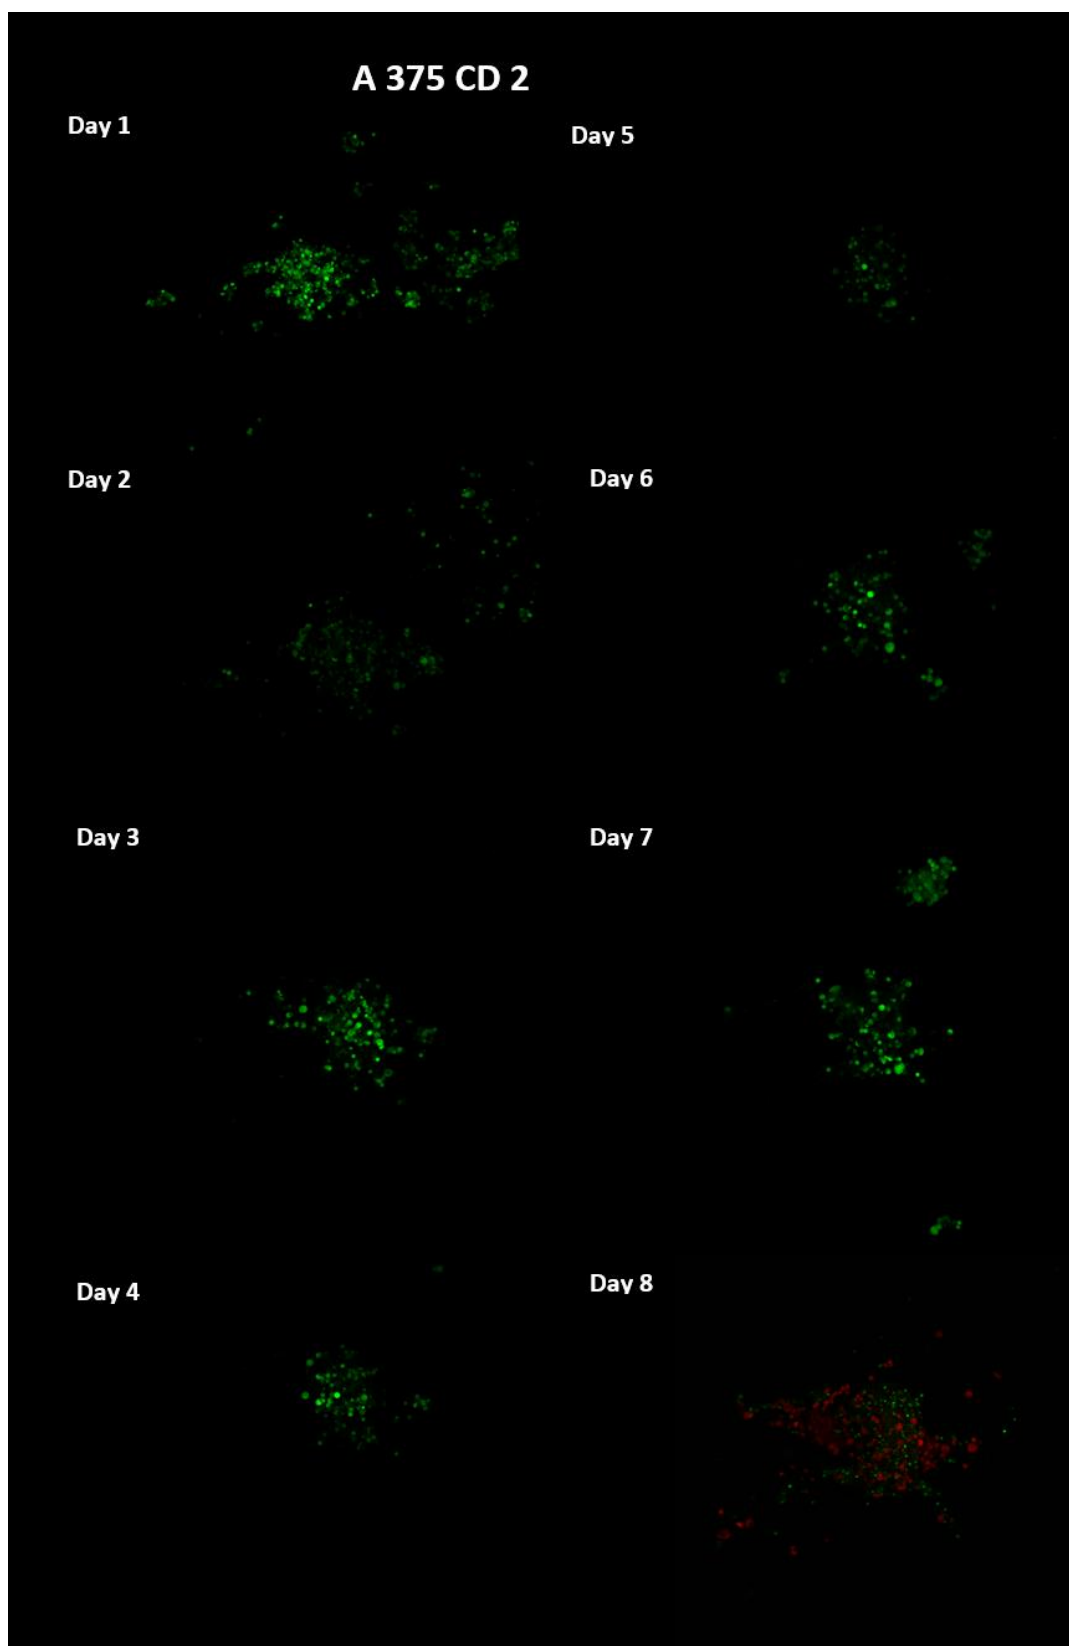

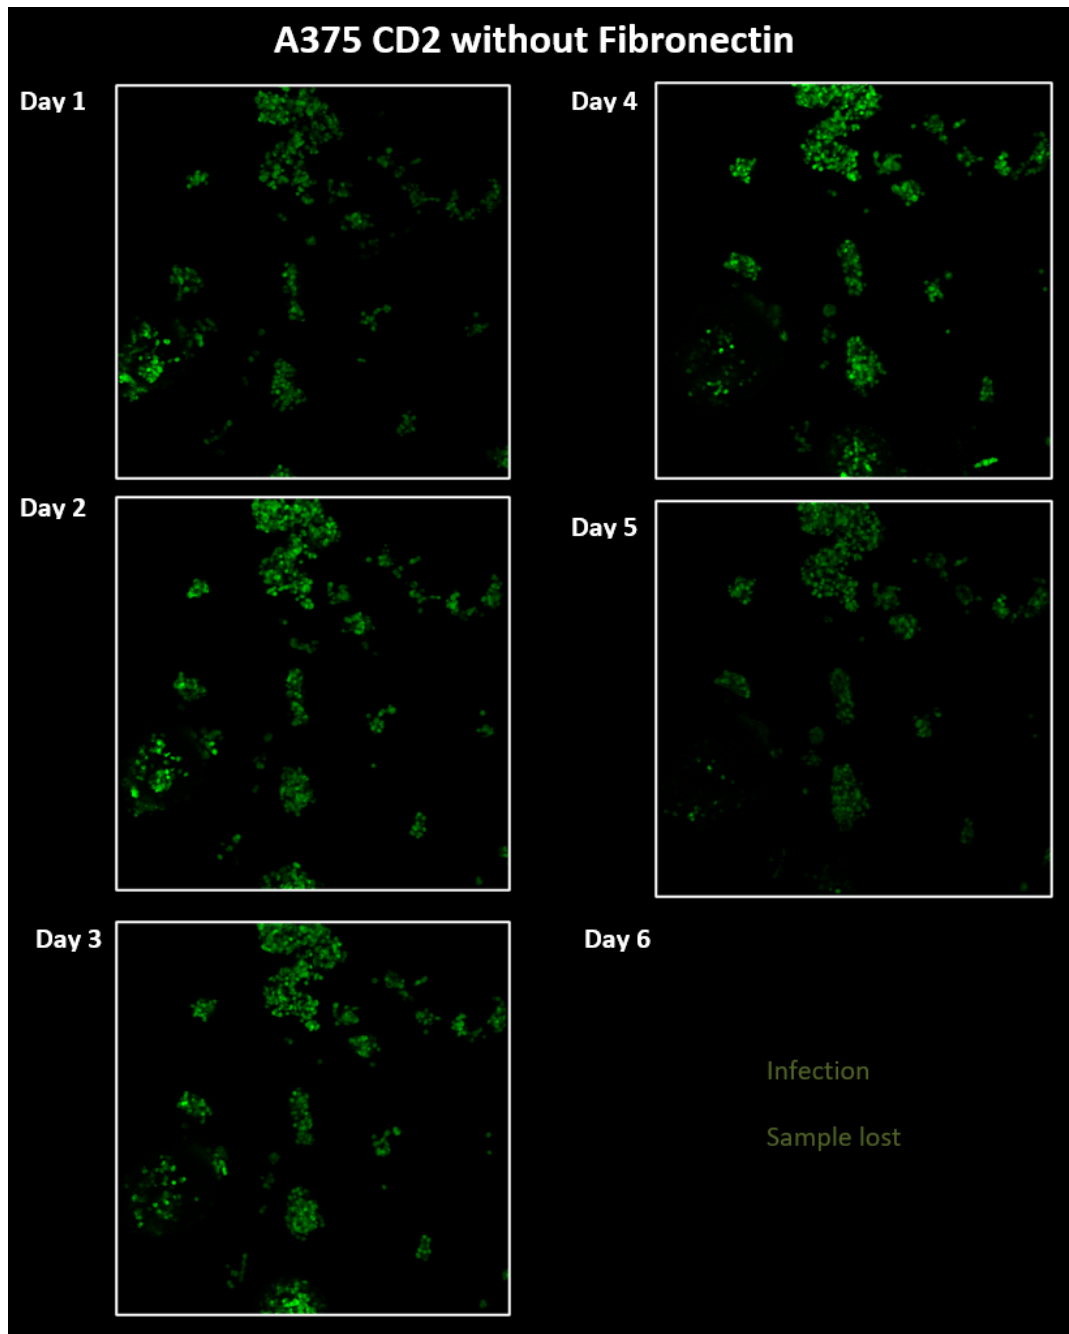



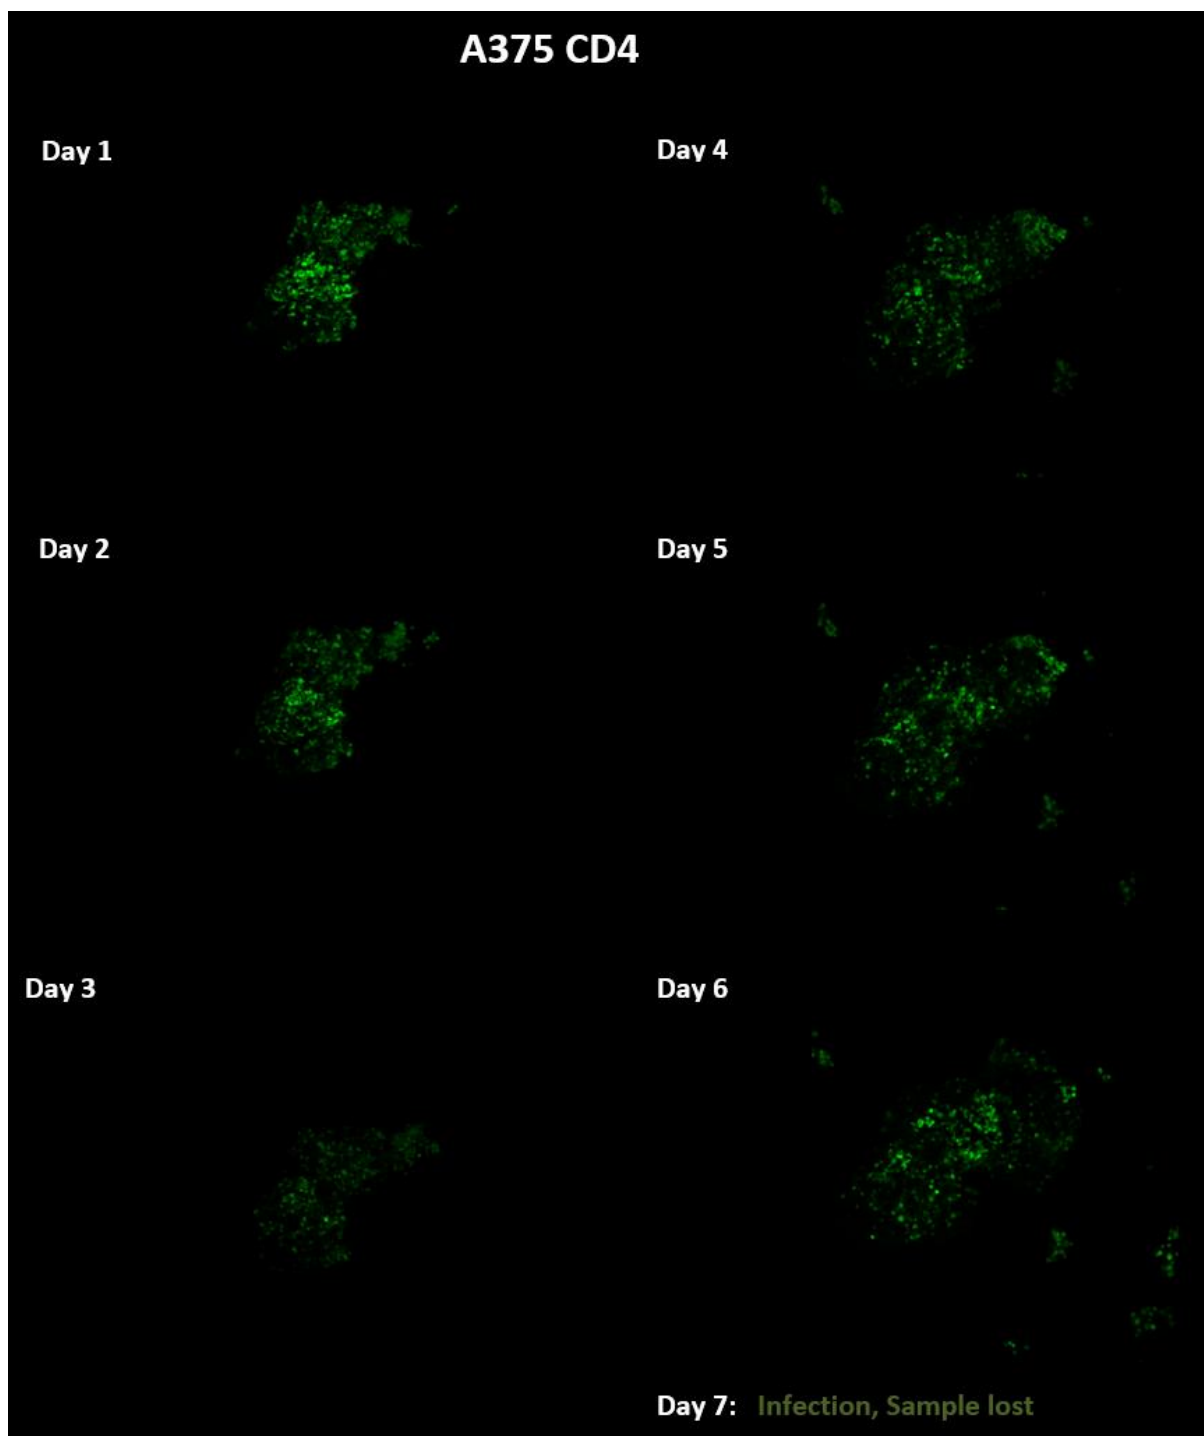

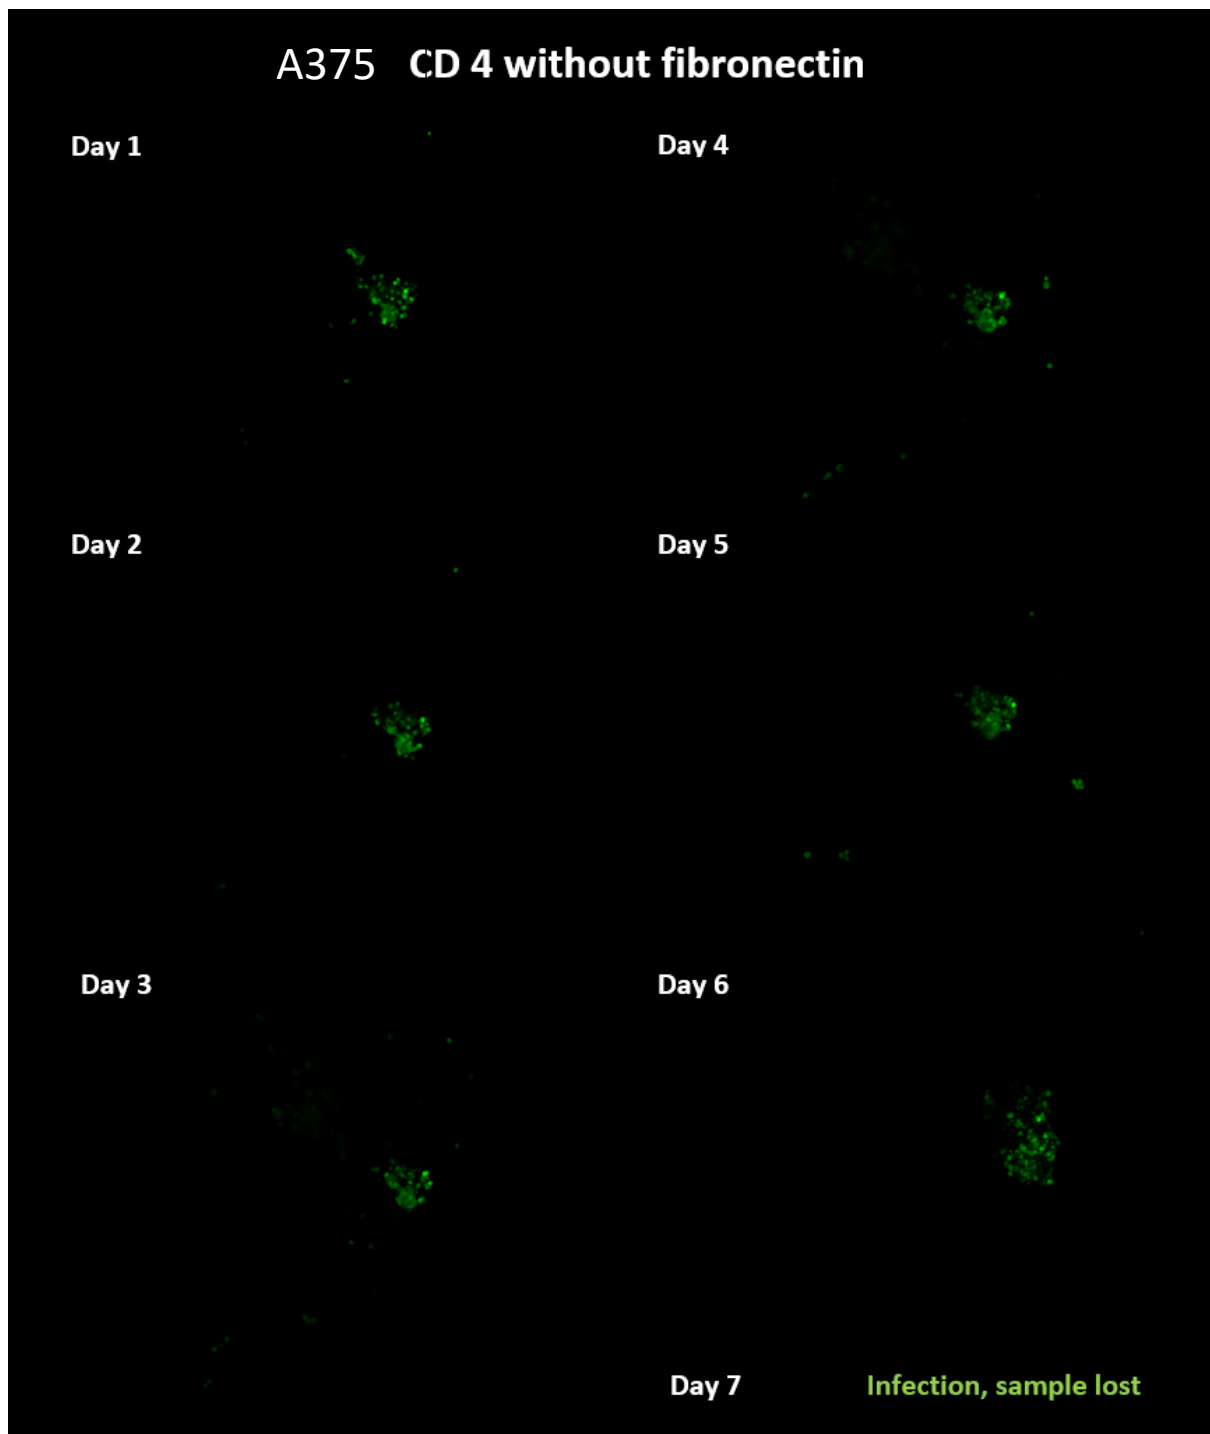

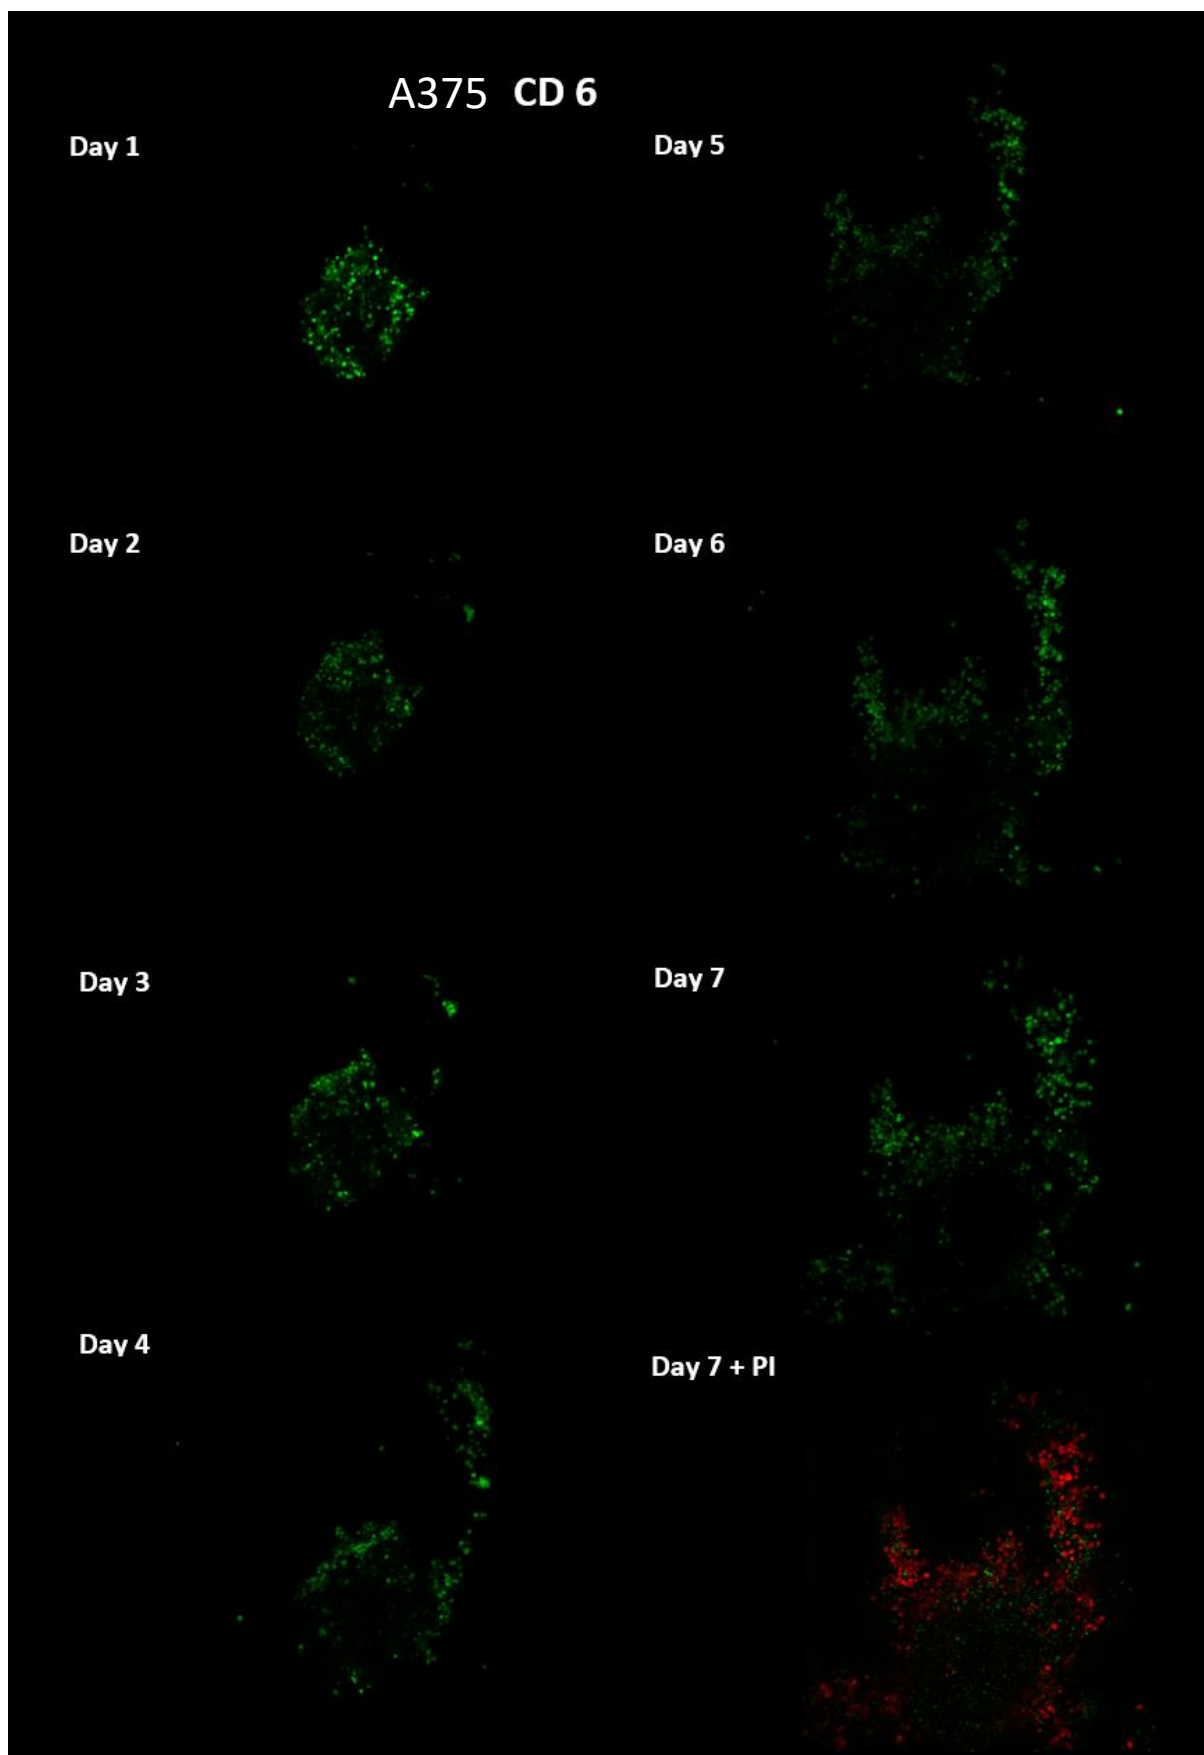

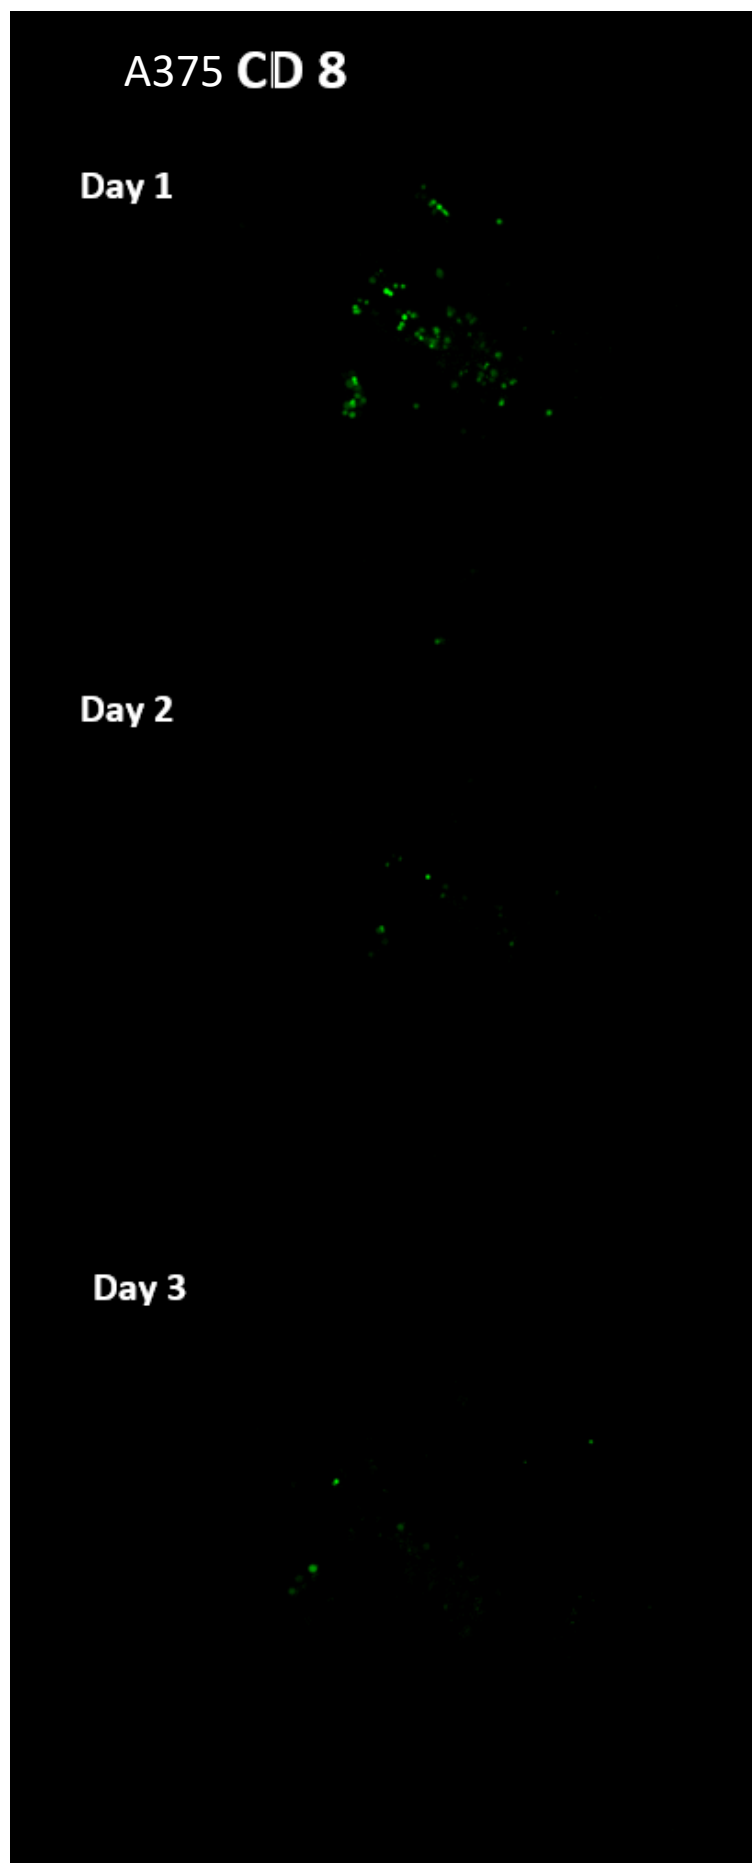

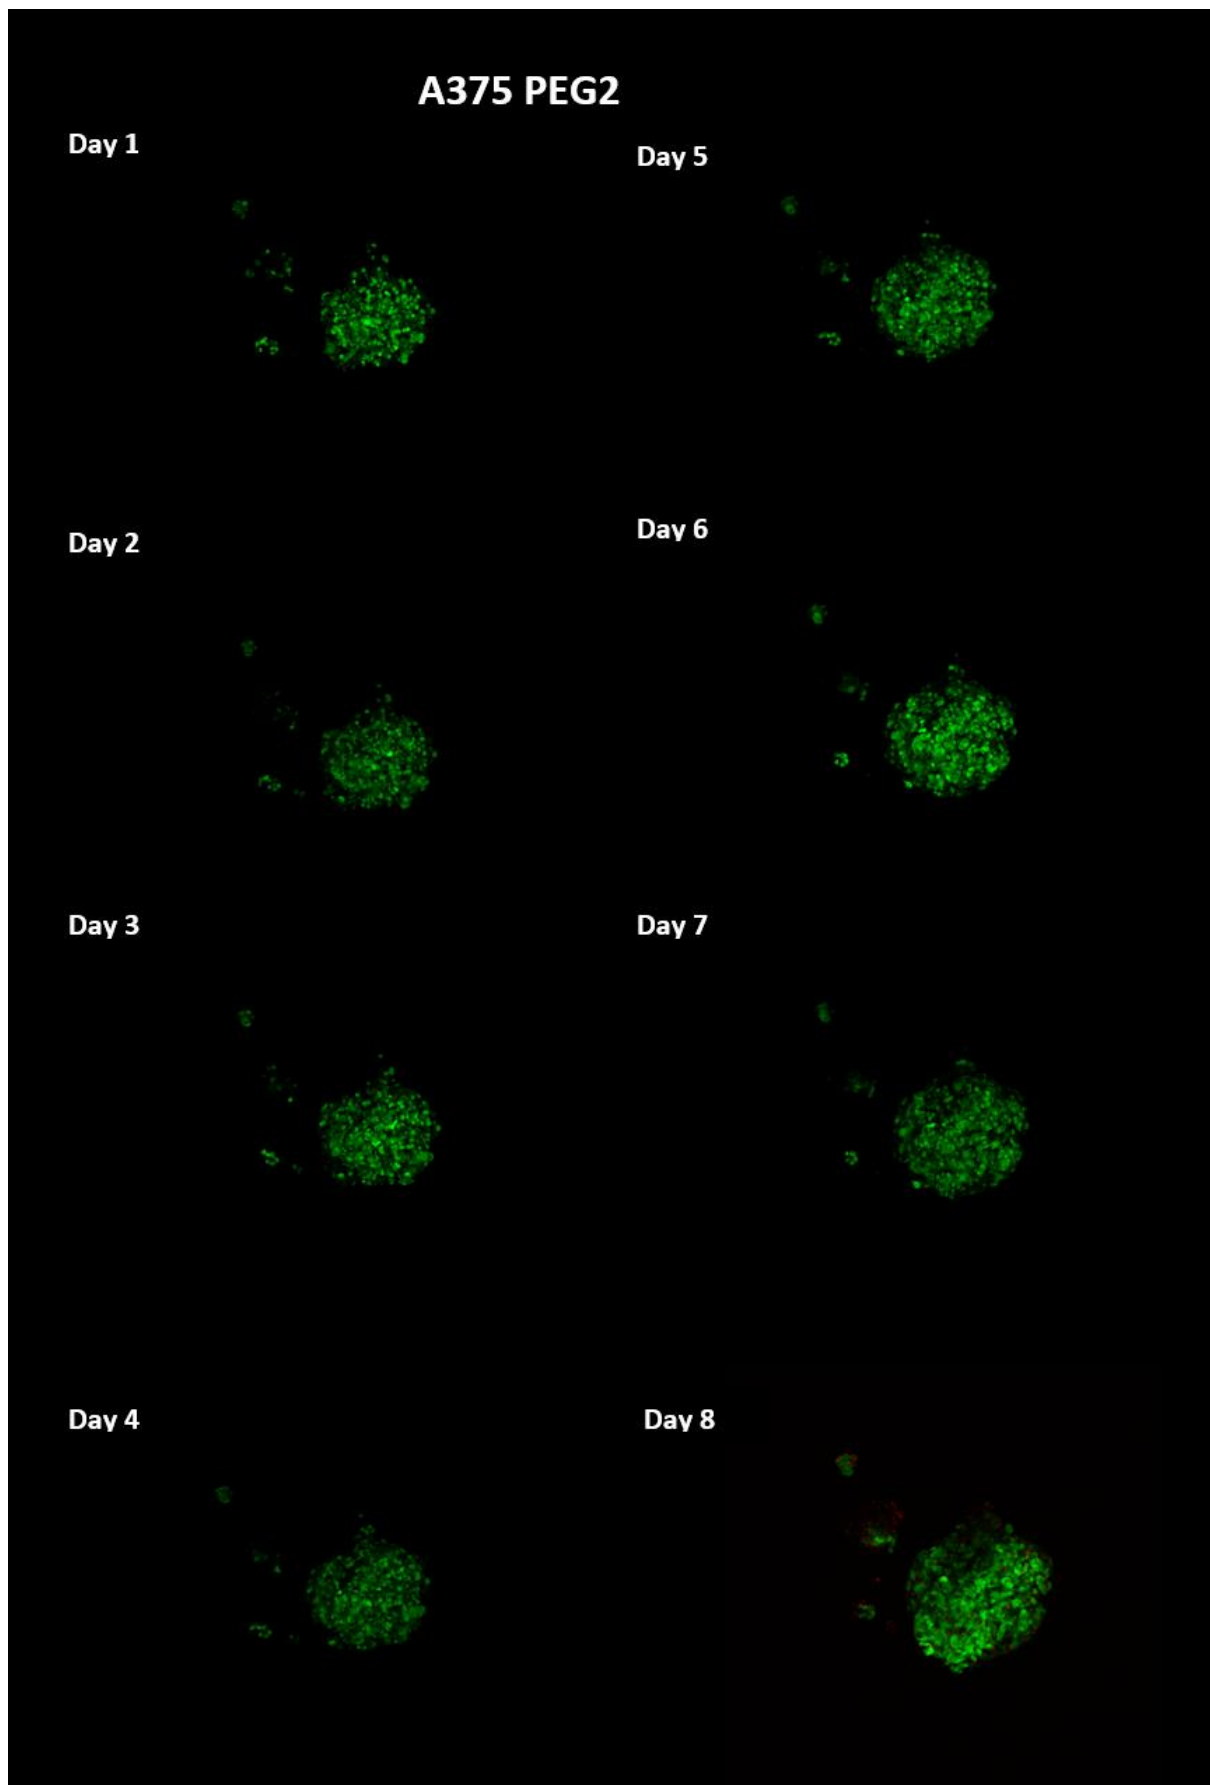

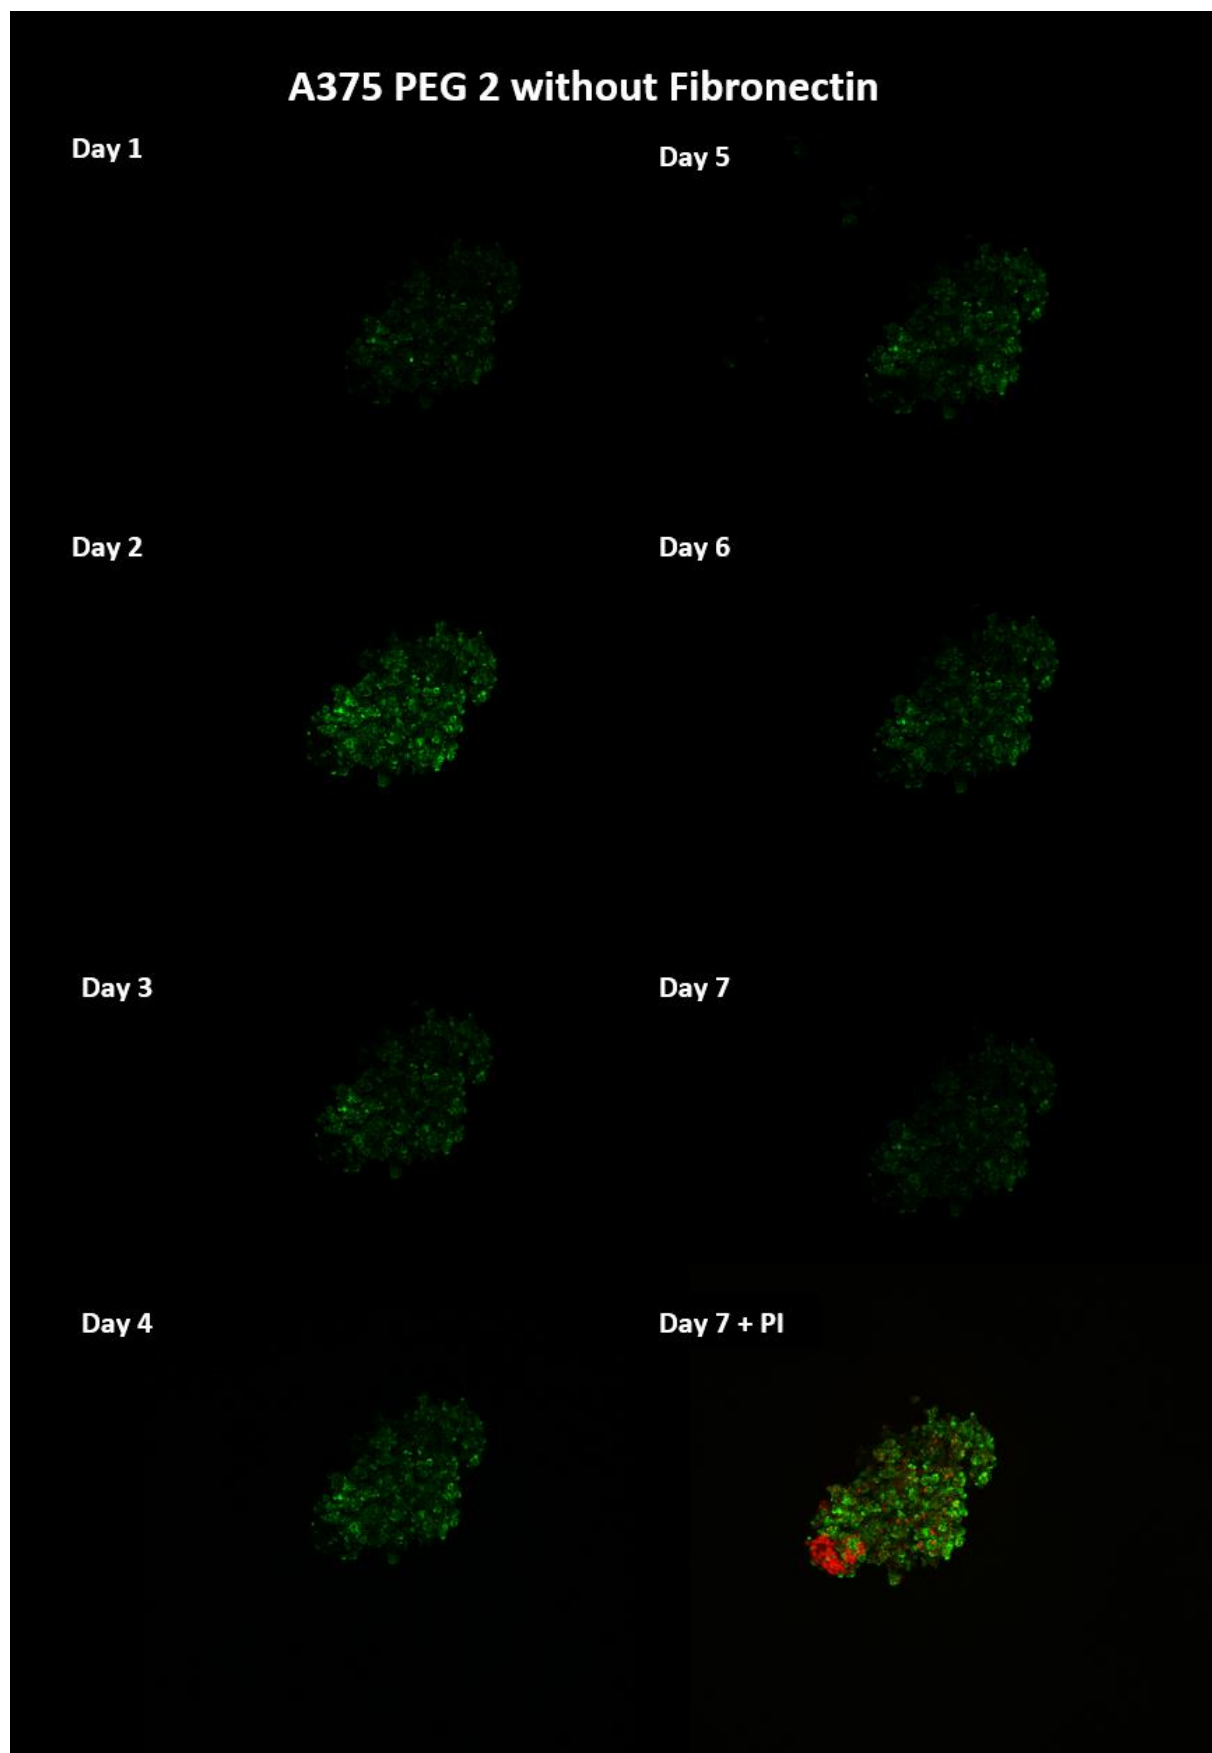

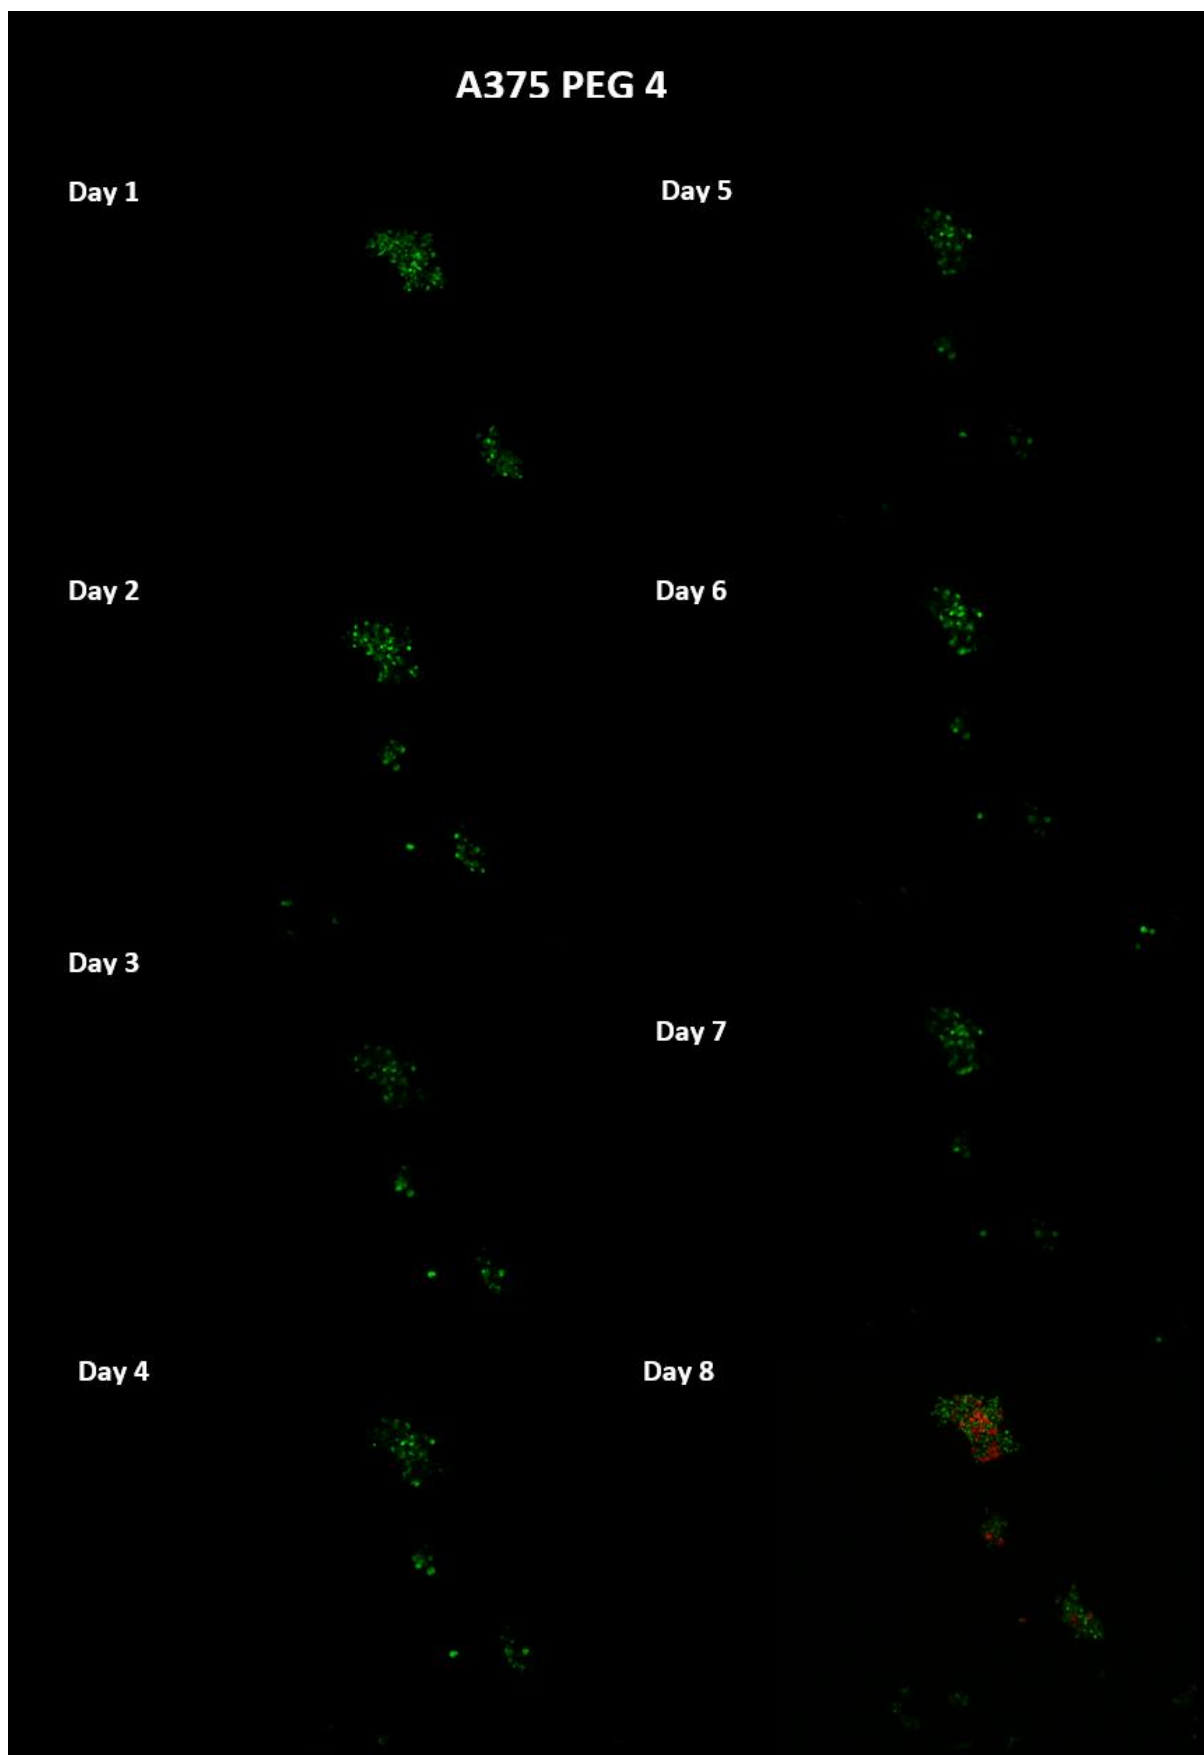

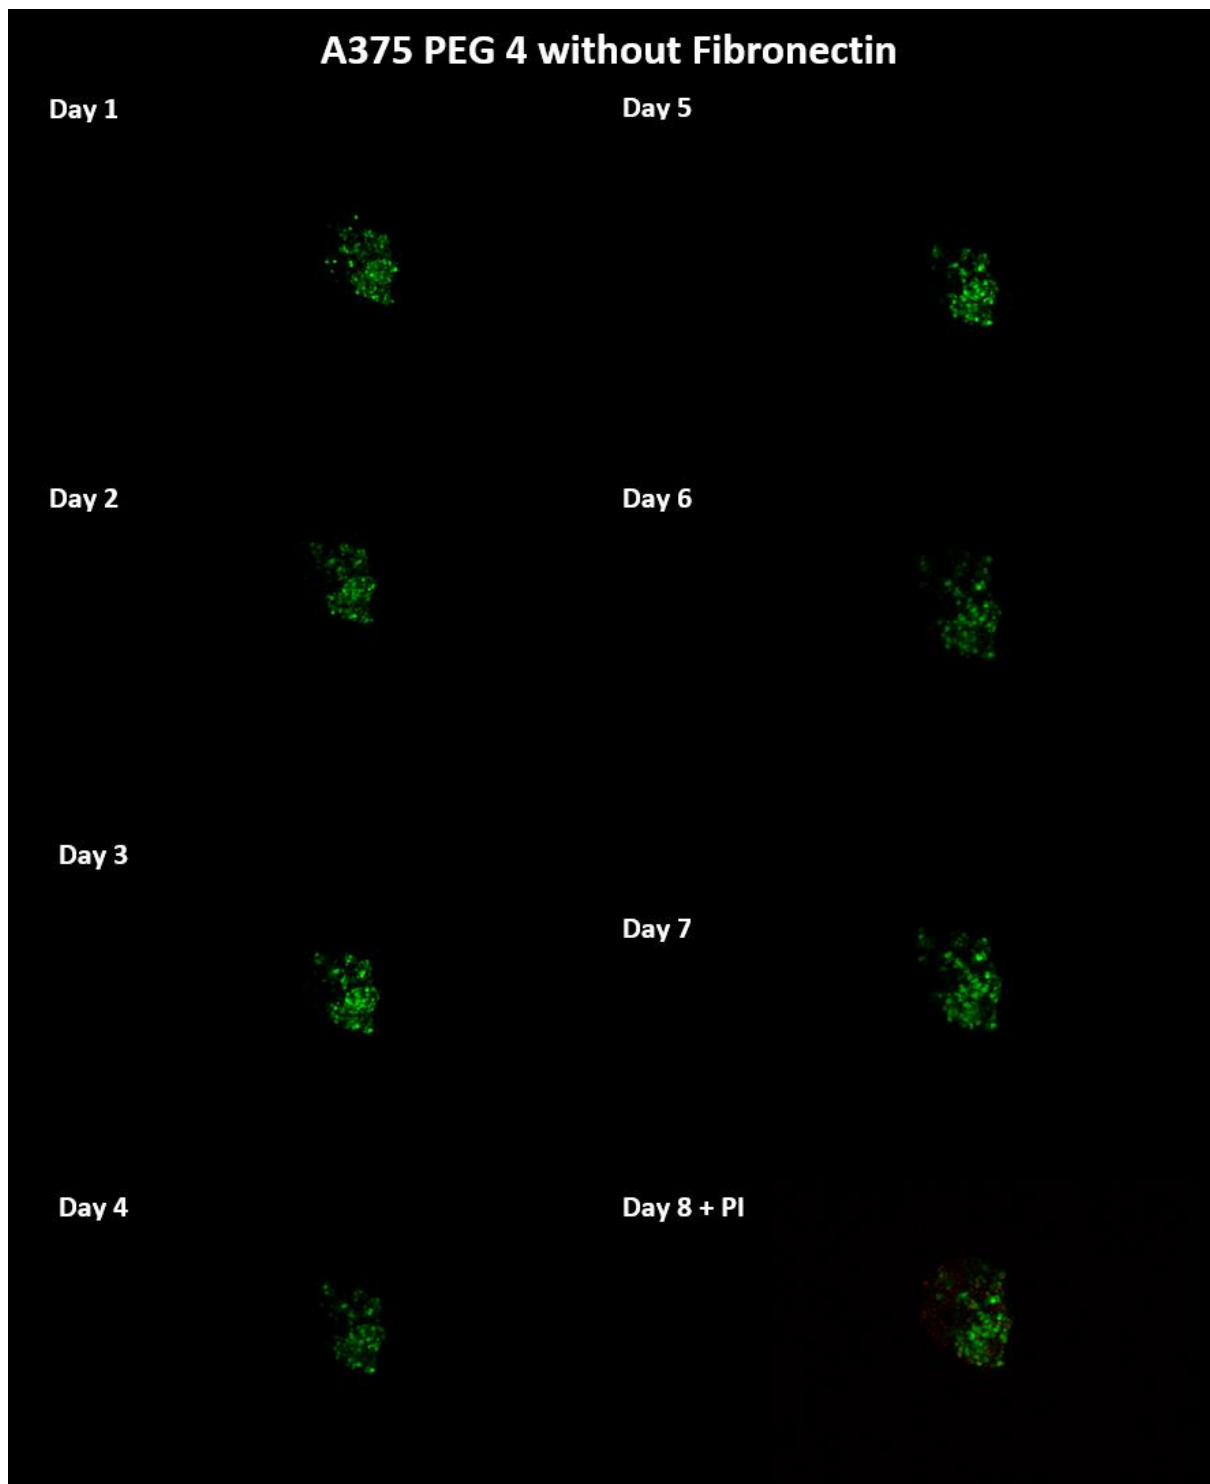



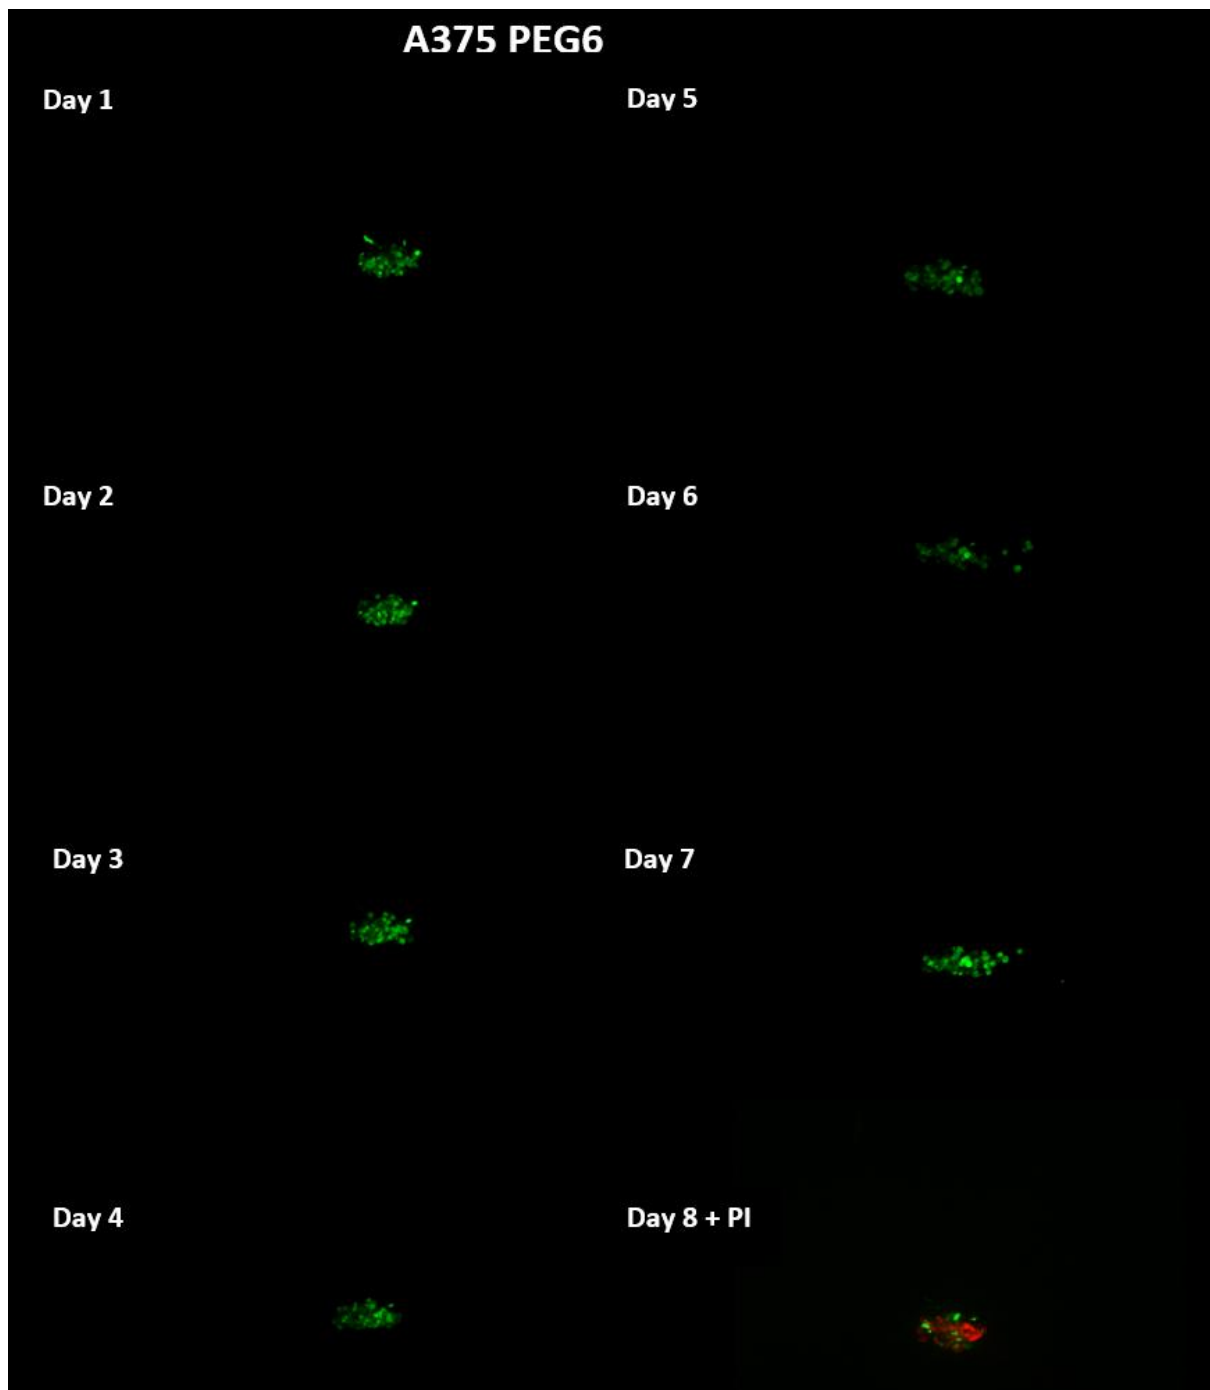

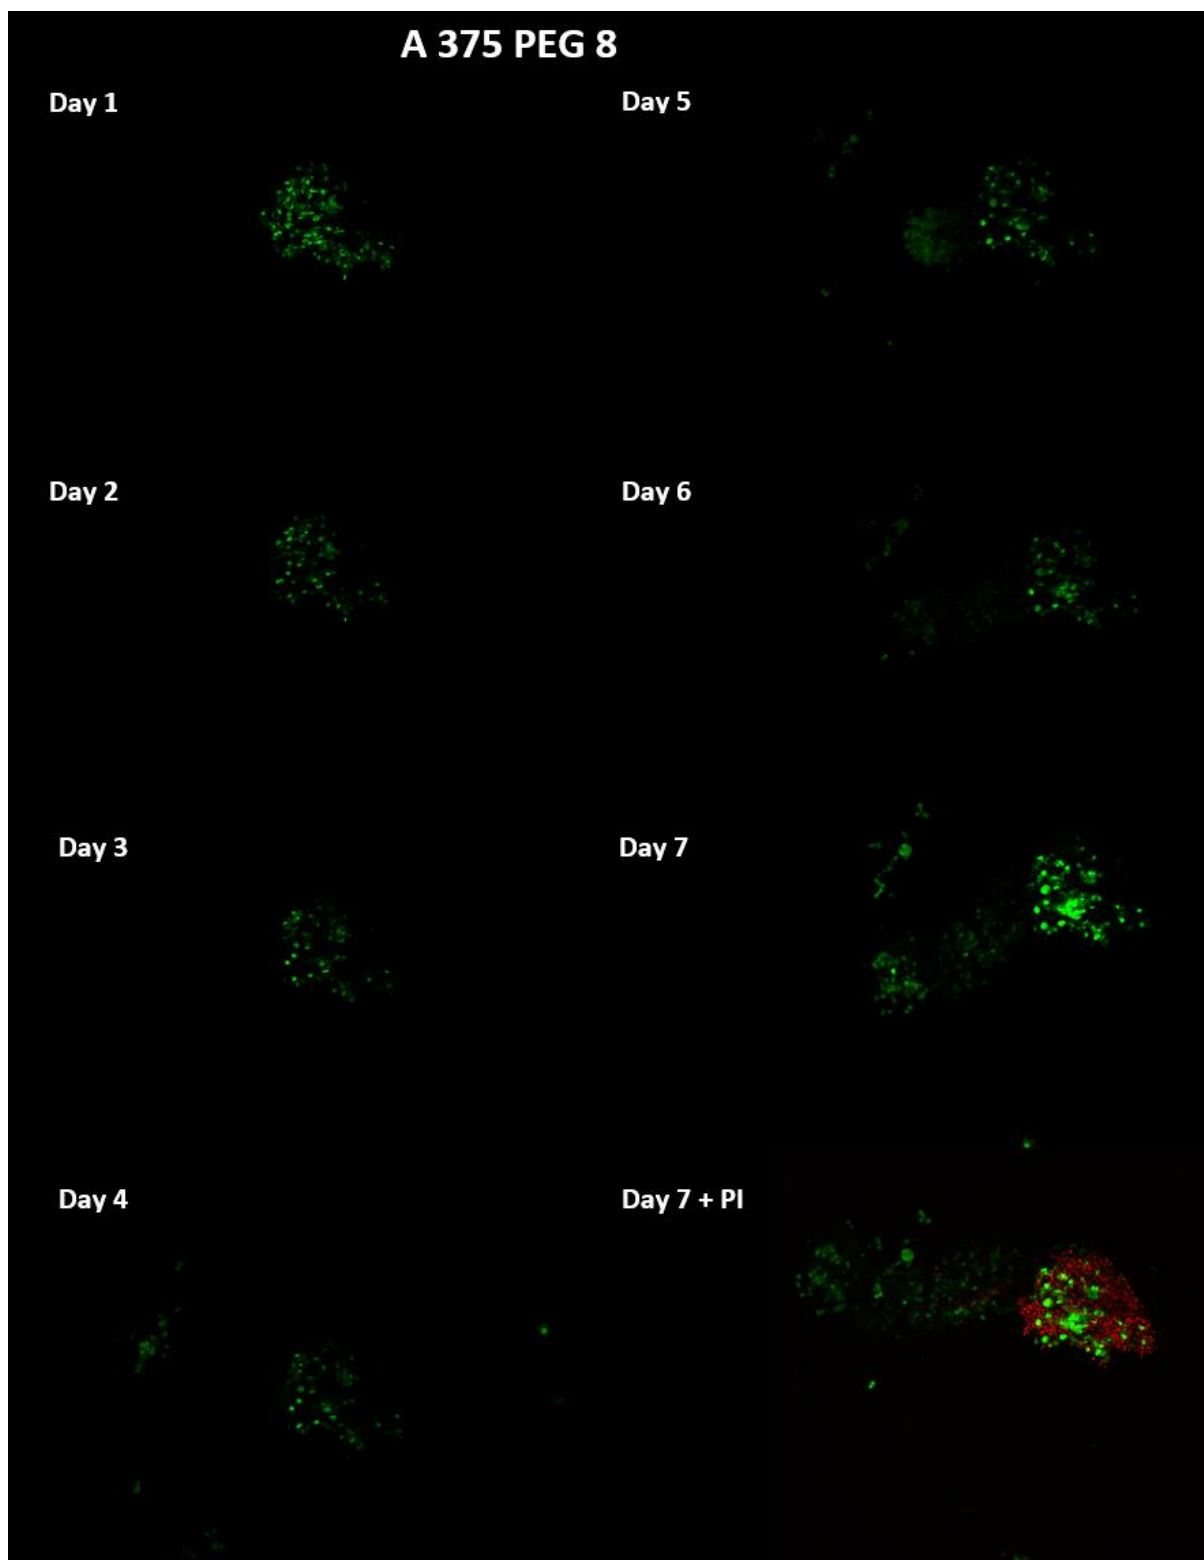

## A375– Third Iteration

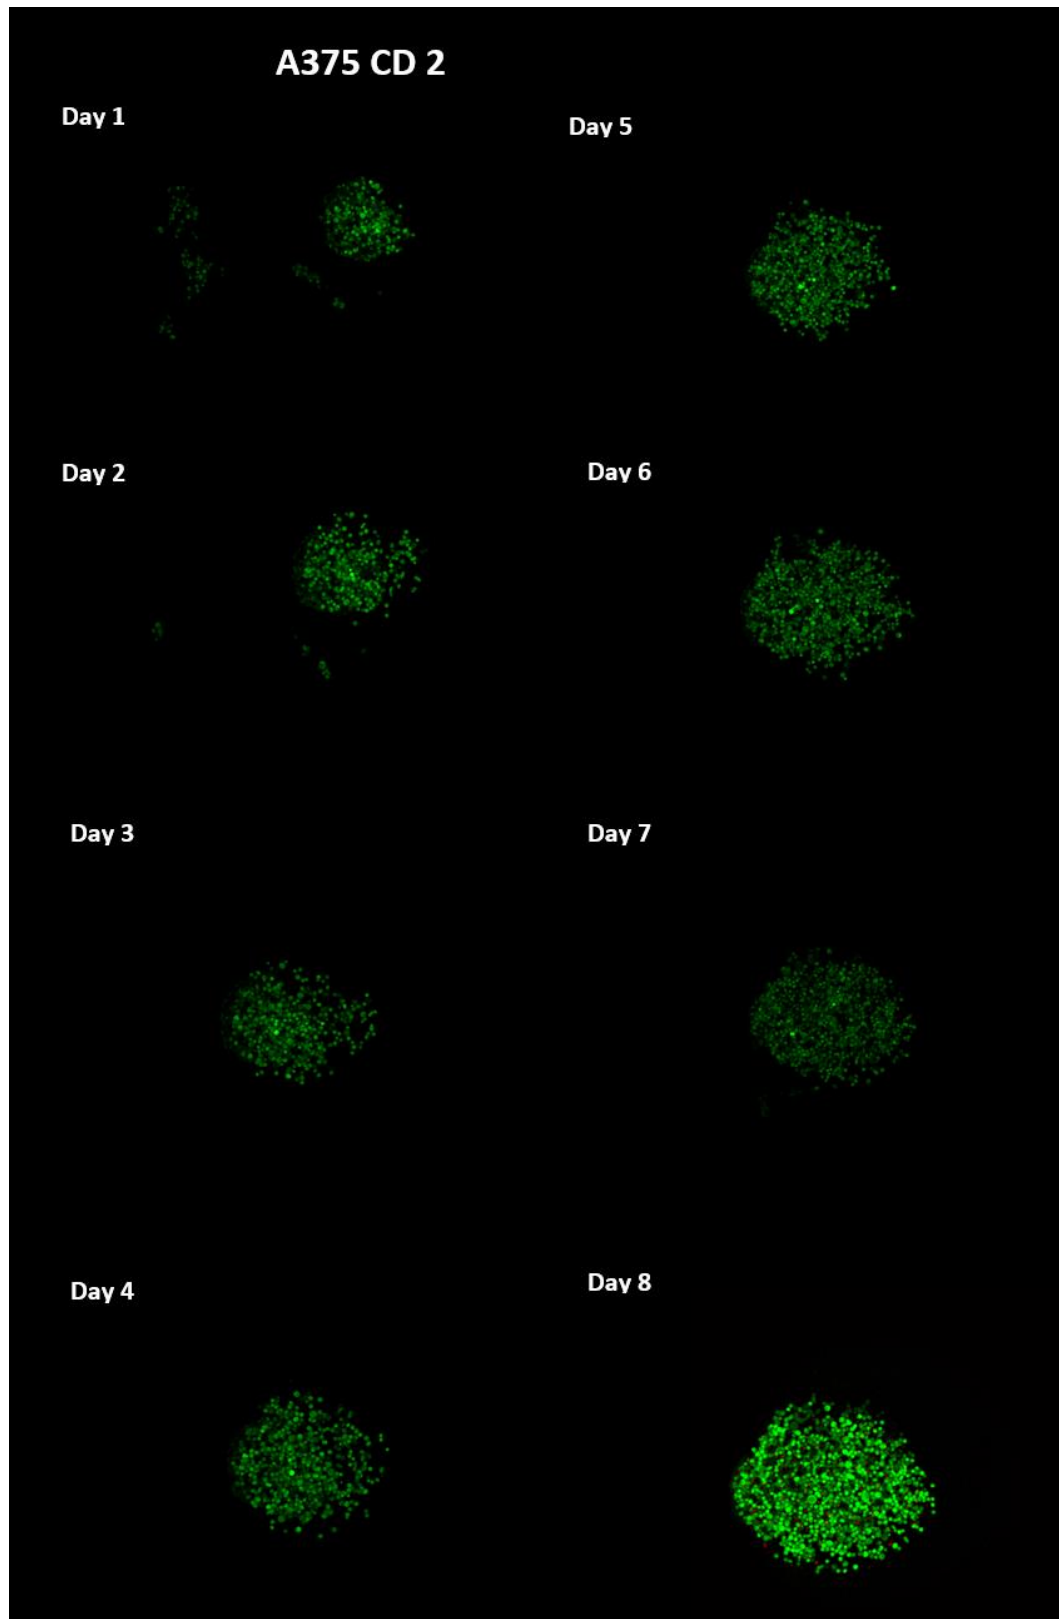

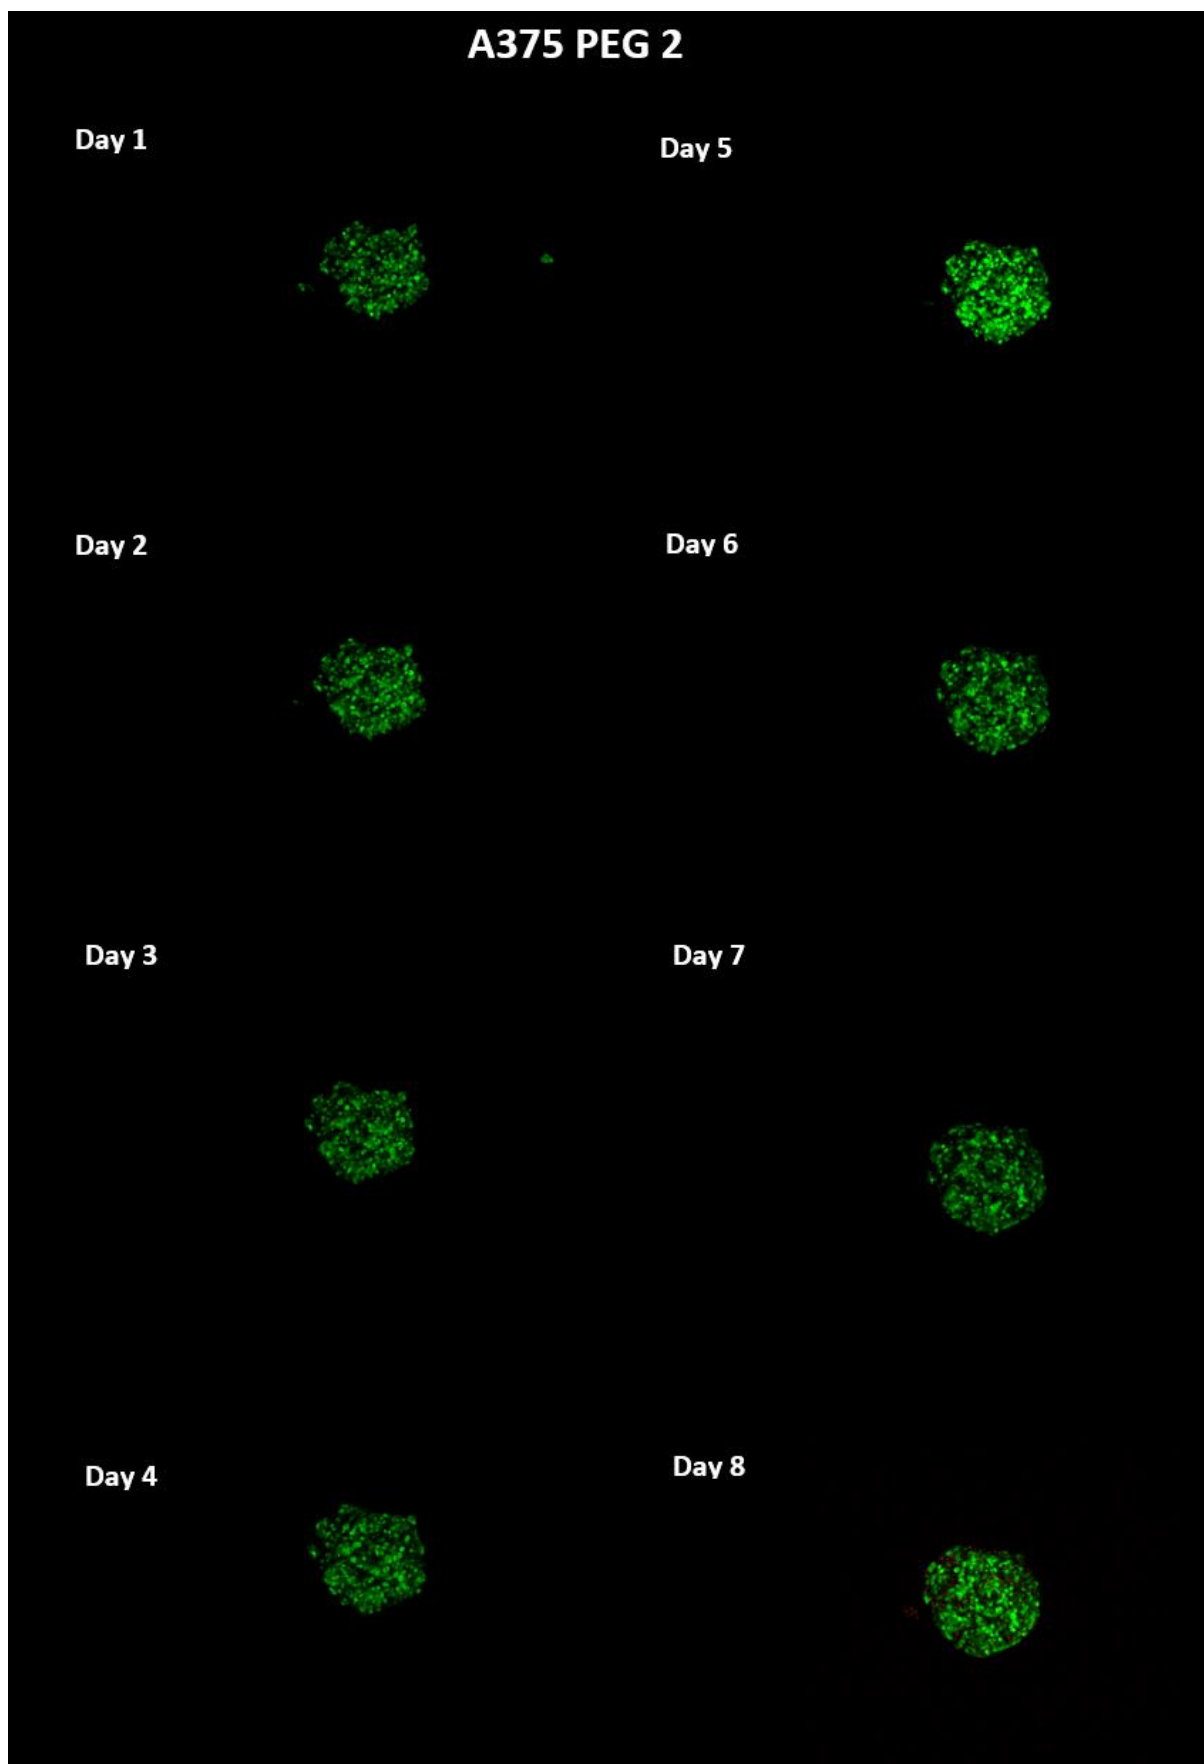

Supplement: s1 [file s1]
