# Supplementary material for: Mechanistically Coupled PK (MCPK) Model to Describe Enzyme Induction and Occupancy Dependent DDI of Dabrafenib Metabolism
Source: MDPI journal article supplement (doi:10.3390/pharmaceutics14020310), 2022-01-28

# Supplemental Information S5: Mechanistically Coupled PK (MCPK) model to describe enzyme induction and occupancy dependent DDI of dabrafenib metabolism

Marco Albrecht<sup>1,2</sup>, Yuri Kogan<sup>3</sup>, Dagmar Kulms<sup>4</sup>, and Thomas Sauter<sup>5</sup>

<sup>1</sup>*Université du Luxembourg; Systems Biology Group; 4367 Belvaux; Luxembourg; Email: marco.albrecht@posteo.eu*

<sup>2</sup>*esqLABS GmbH; 26683 Saterland; Germany; Email: marco.albrecht@esqlabs.com*

<sup>3</sup>*Institute for Medical Biomathematics (IMBM); 60991 Bnei Atarot; Israel; Email: yuri@imbm.com*

<sup>4</sup>*Technical University of Dresden; Experimental Dermatology; 01307 Dresden; Germany; Tel.: +49 (0)351 458-18973 ; Email: dagmar.kulms@uniklinikum-dresden.de*

<sup>5</sup>*Université du Luxembourg; Systems Biology Group; 4367 Belvaux; Luxembourg; Tel.: (+352) 46 66 44 6296; Email: thomas.sauter@uni.lu*

## Spheroid Image Data of SKmel2 Spheroid Growth

|                                                    |   |
|----------------------------------------------------|---|
| Spheroid Image Data of SKmel2 Spheroid Growth..... | 1 |
| Legend.....                                        | 1 |
| SKmel2– First Iteration.....                       | 2 |

## Legend

CD: Gel with cell degradable linker

PEG: Gel with non-degradable polyethylene glycol linker

R1: Biological Replicate 1

SKmel2: Metastatic Melanoma Cell Line with **green** fluorescent protein

PI: Propidium iodide as a **red** cell death marker at last day

# SKmel2– First Iteration

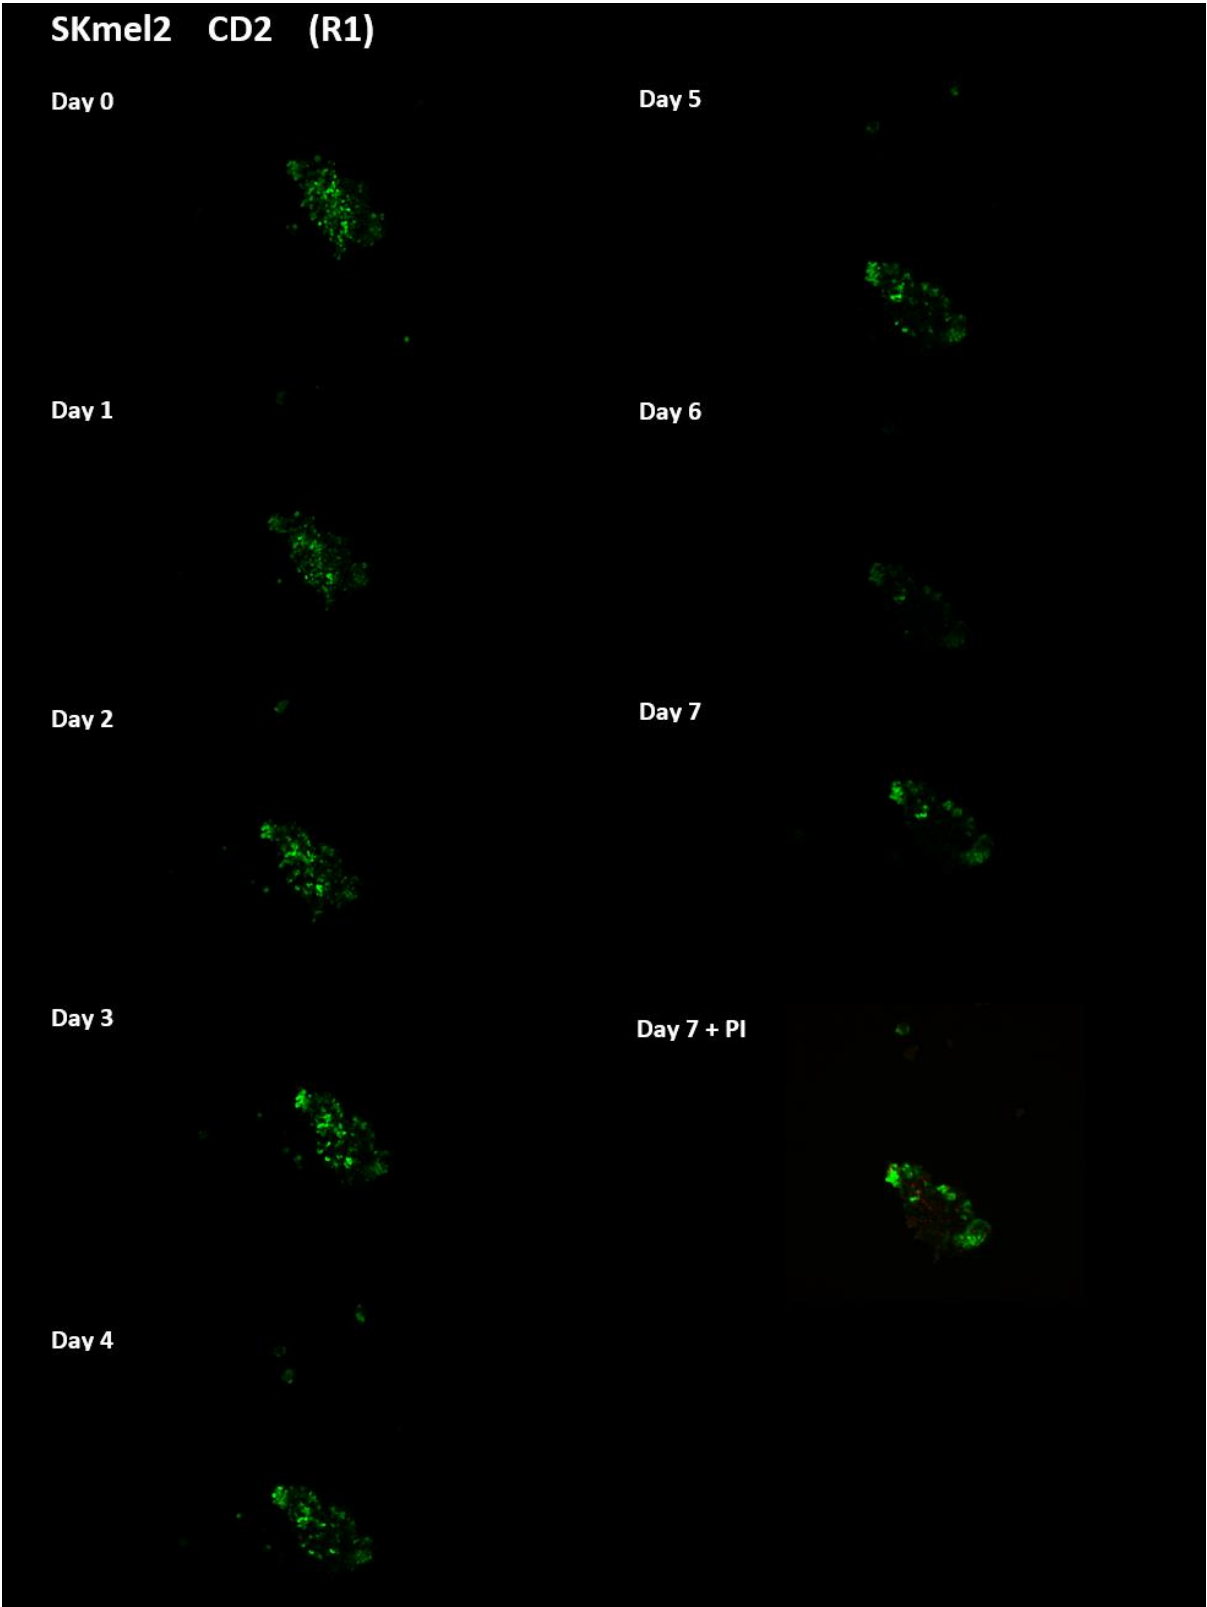

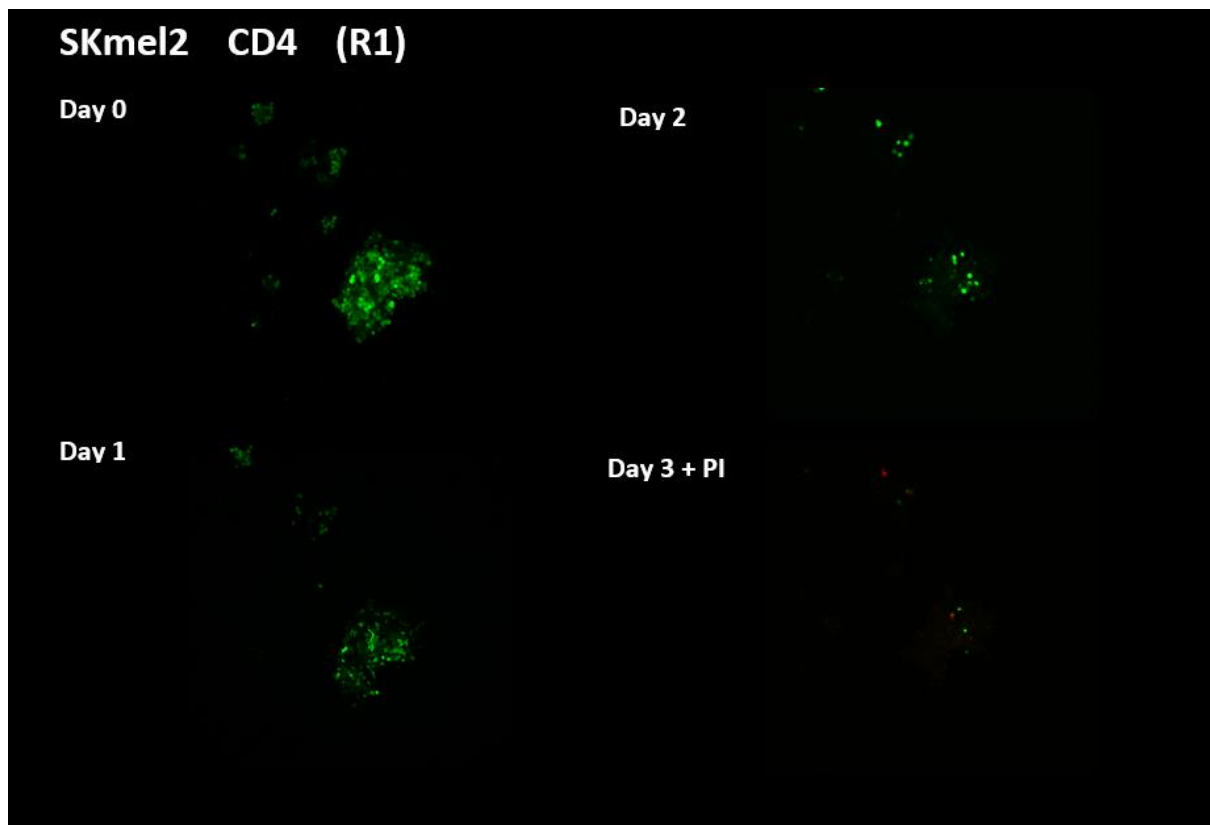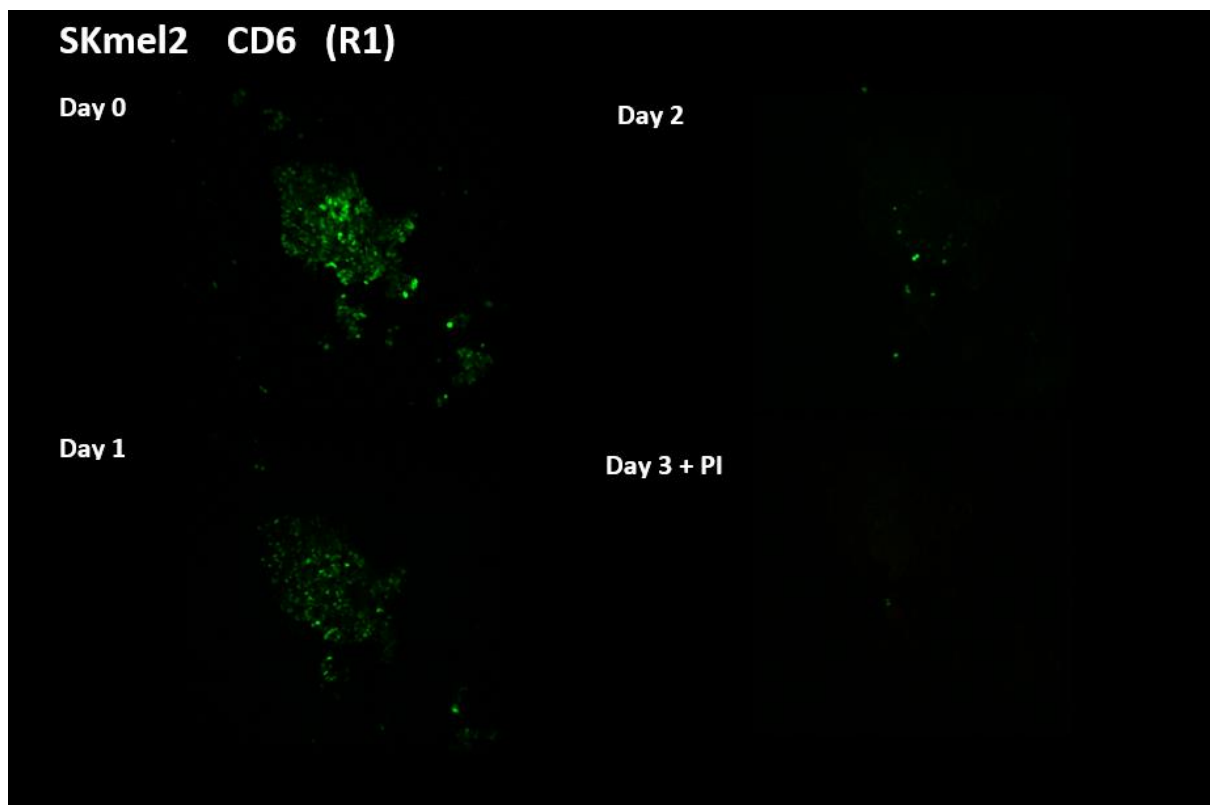

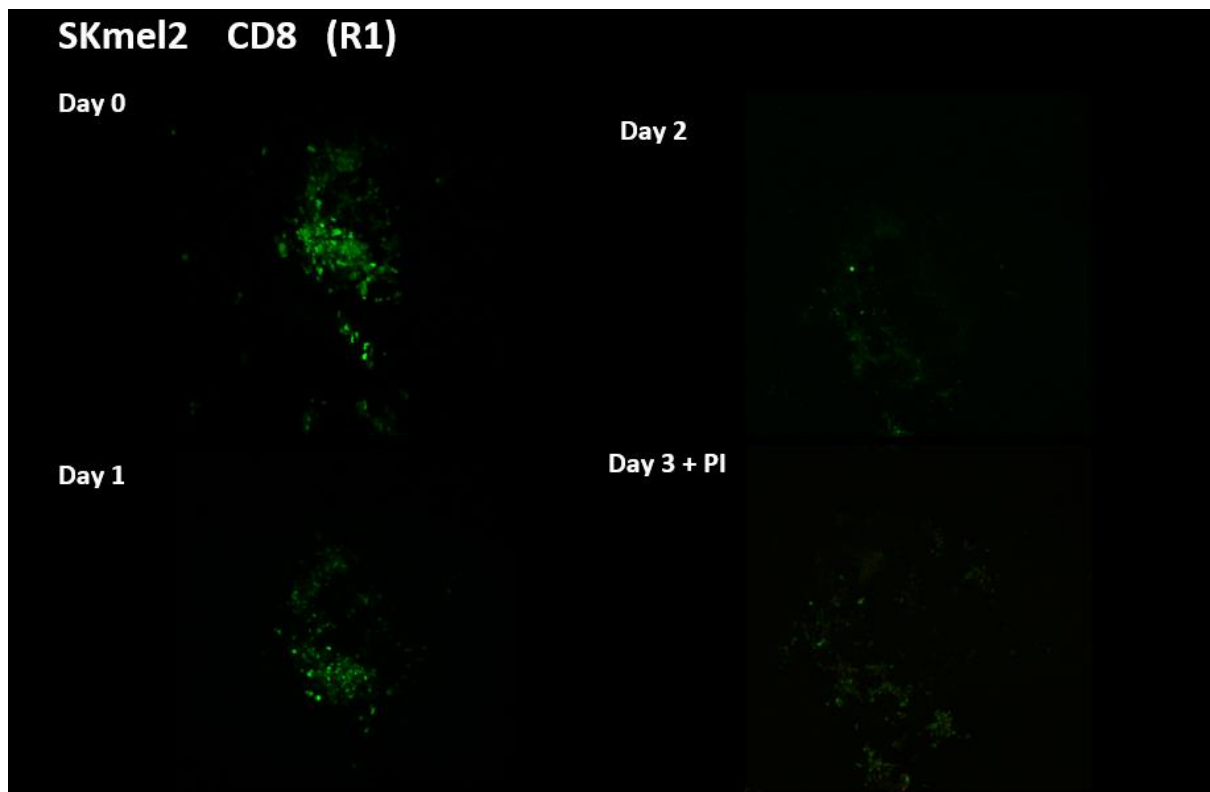

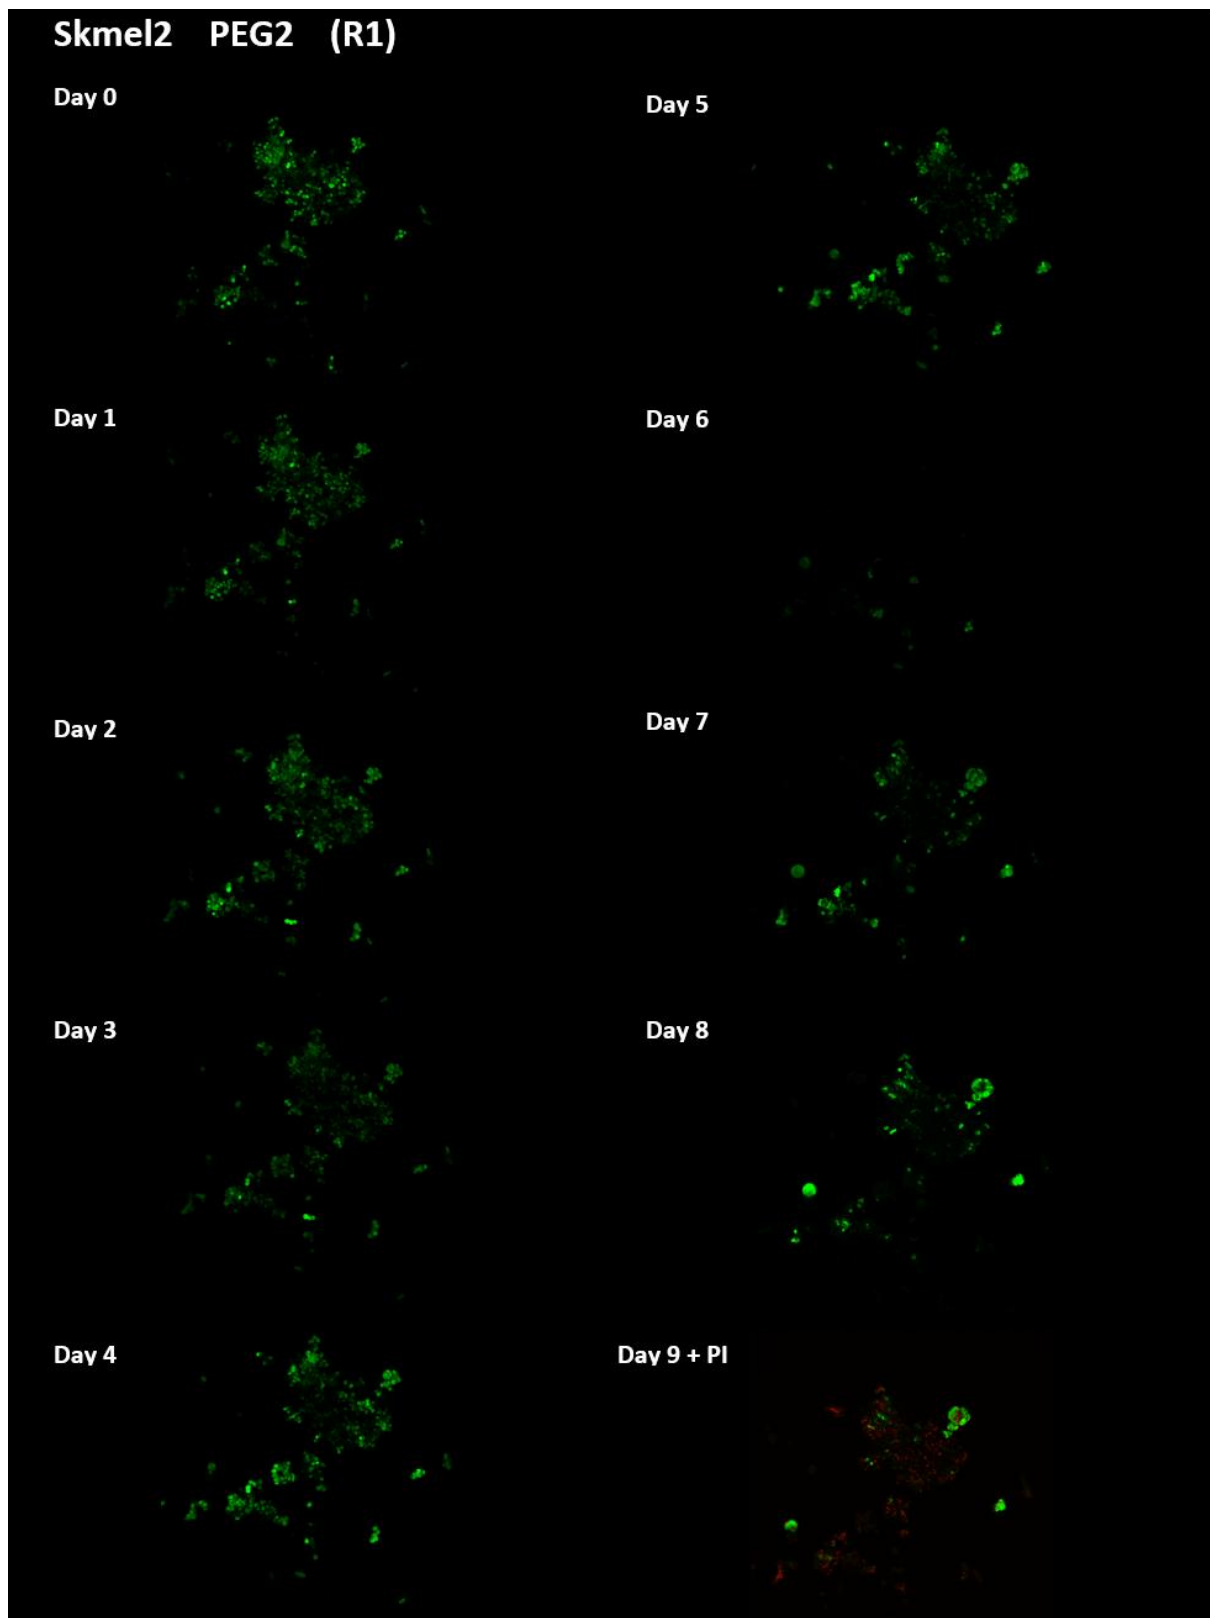

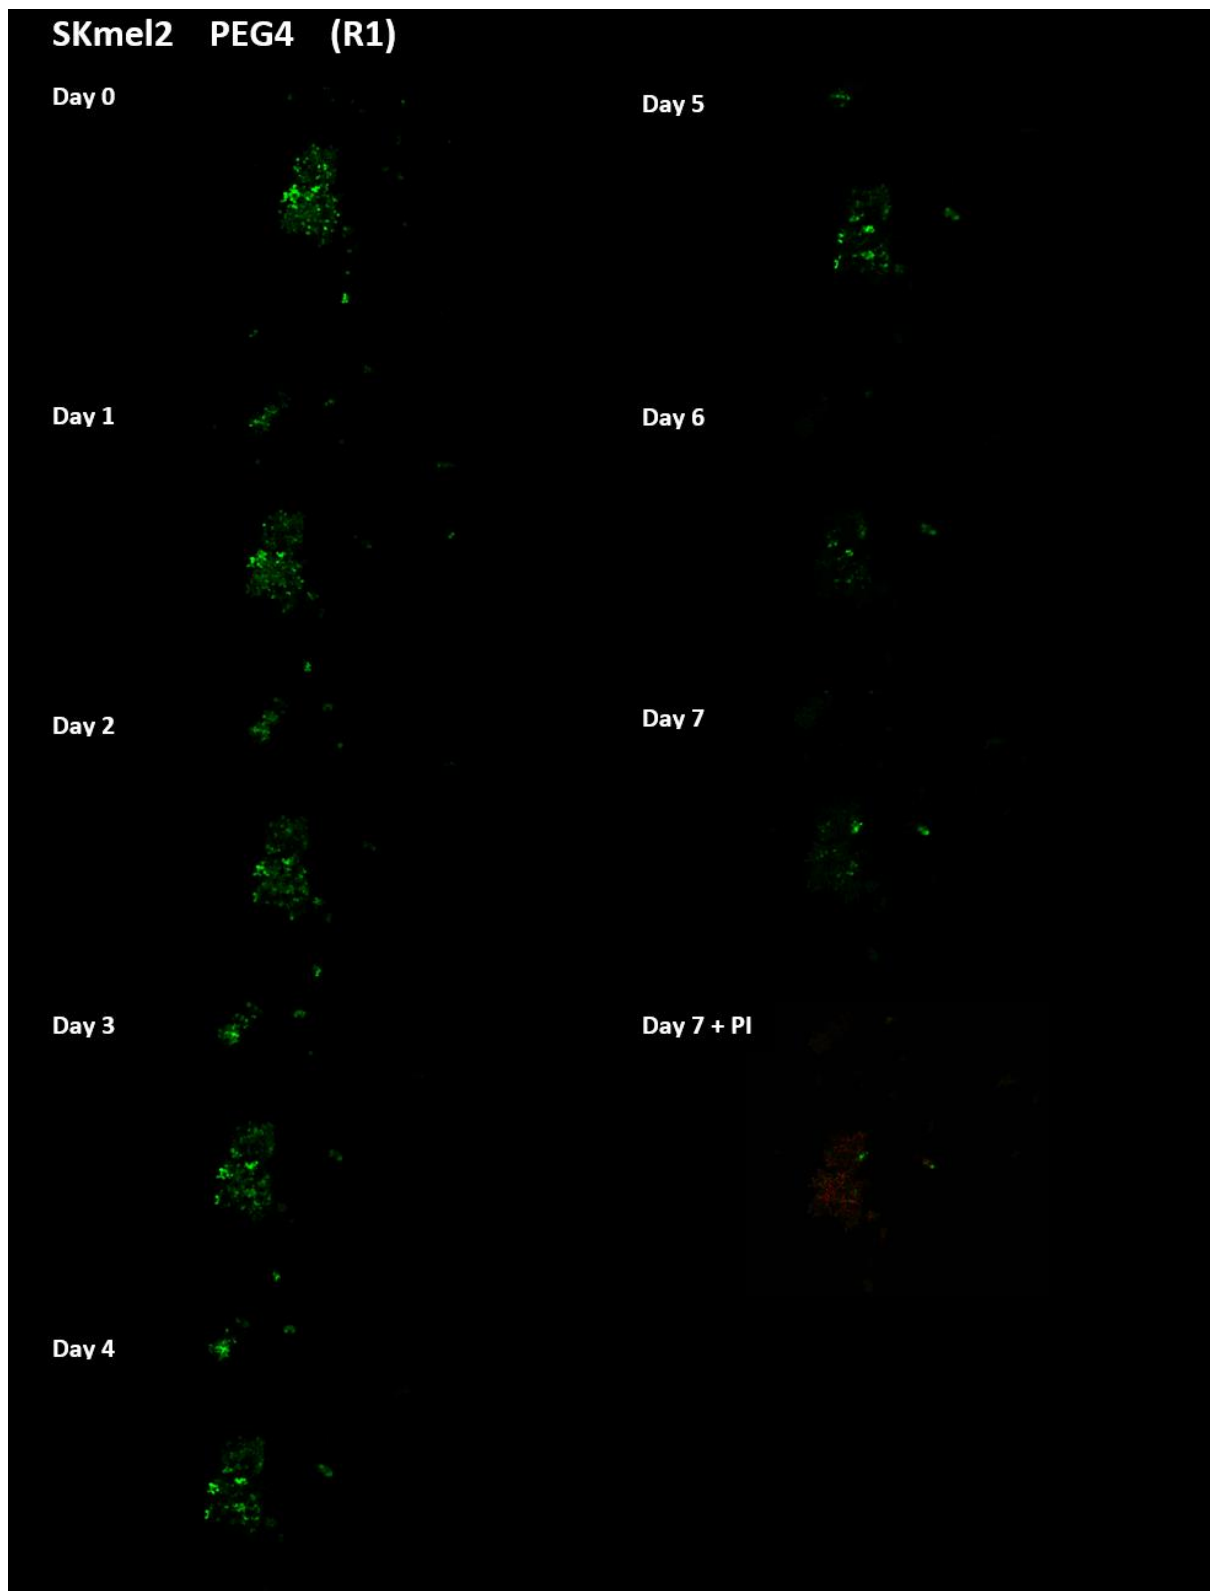

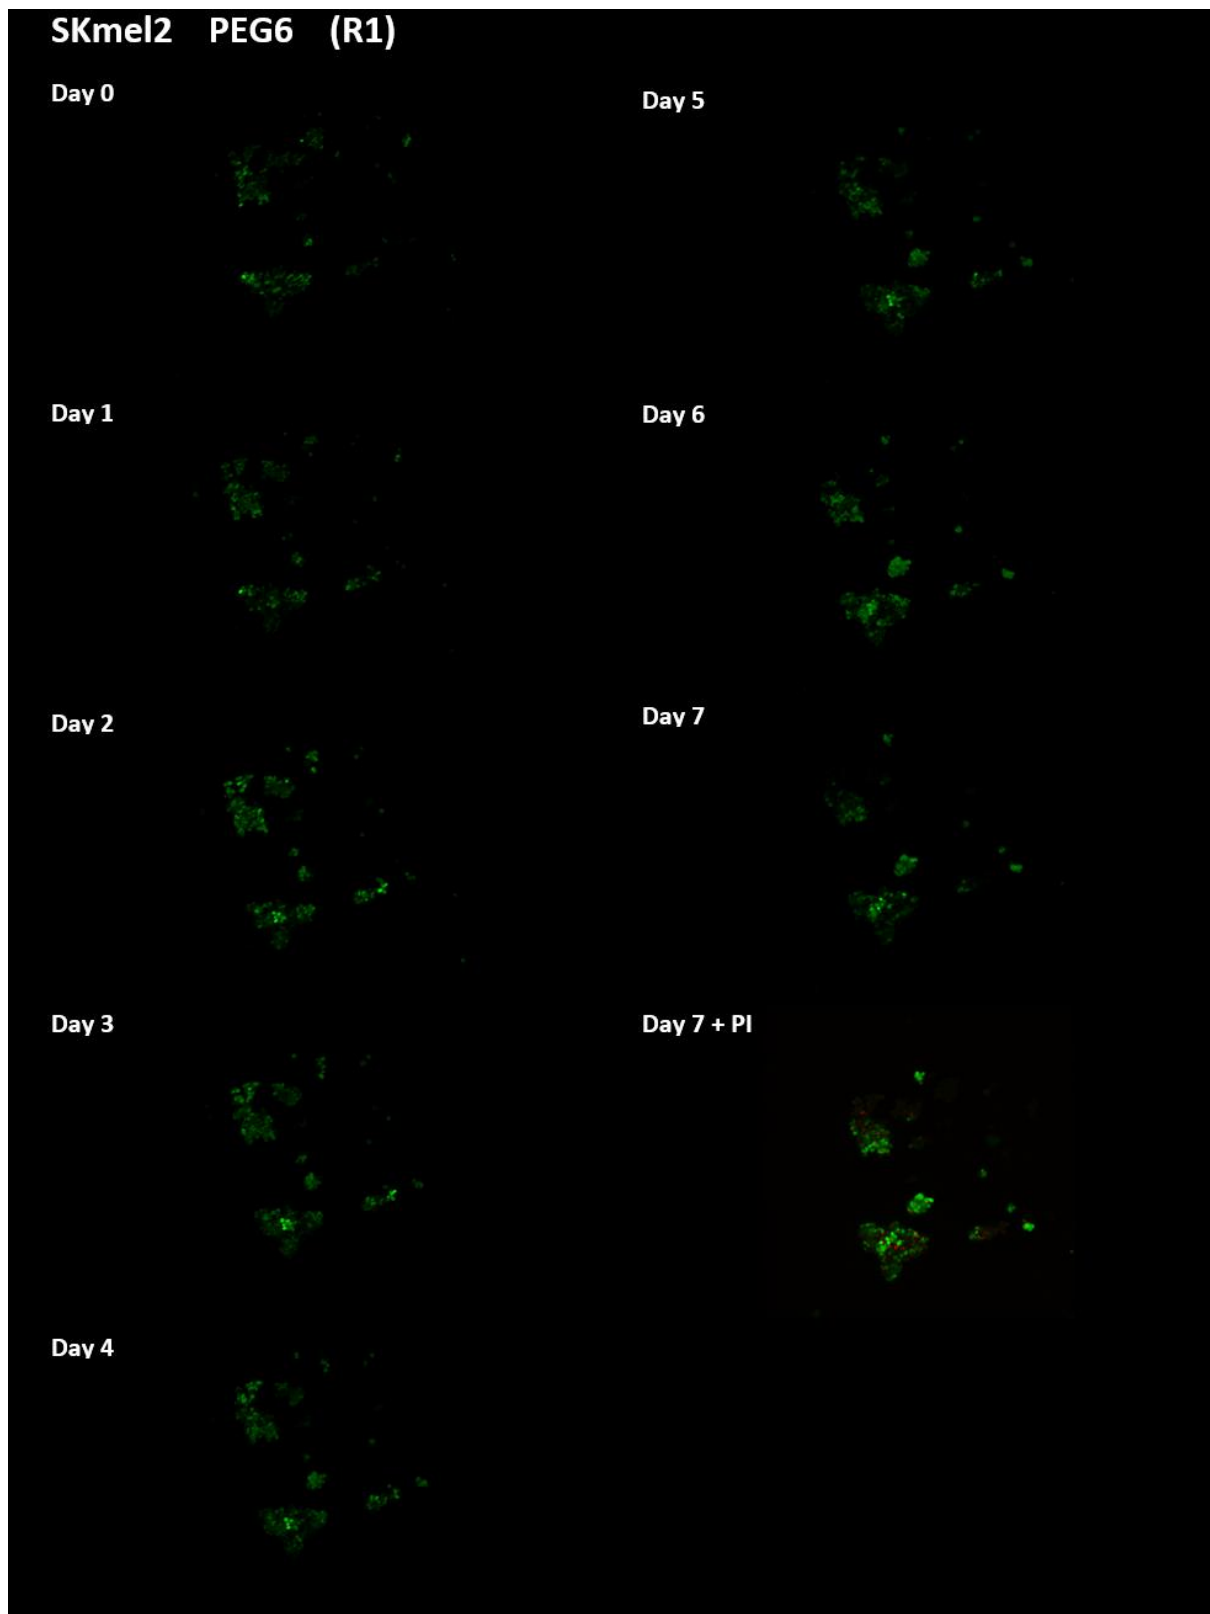

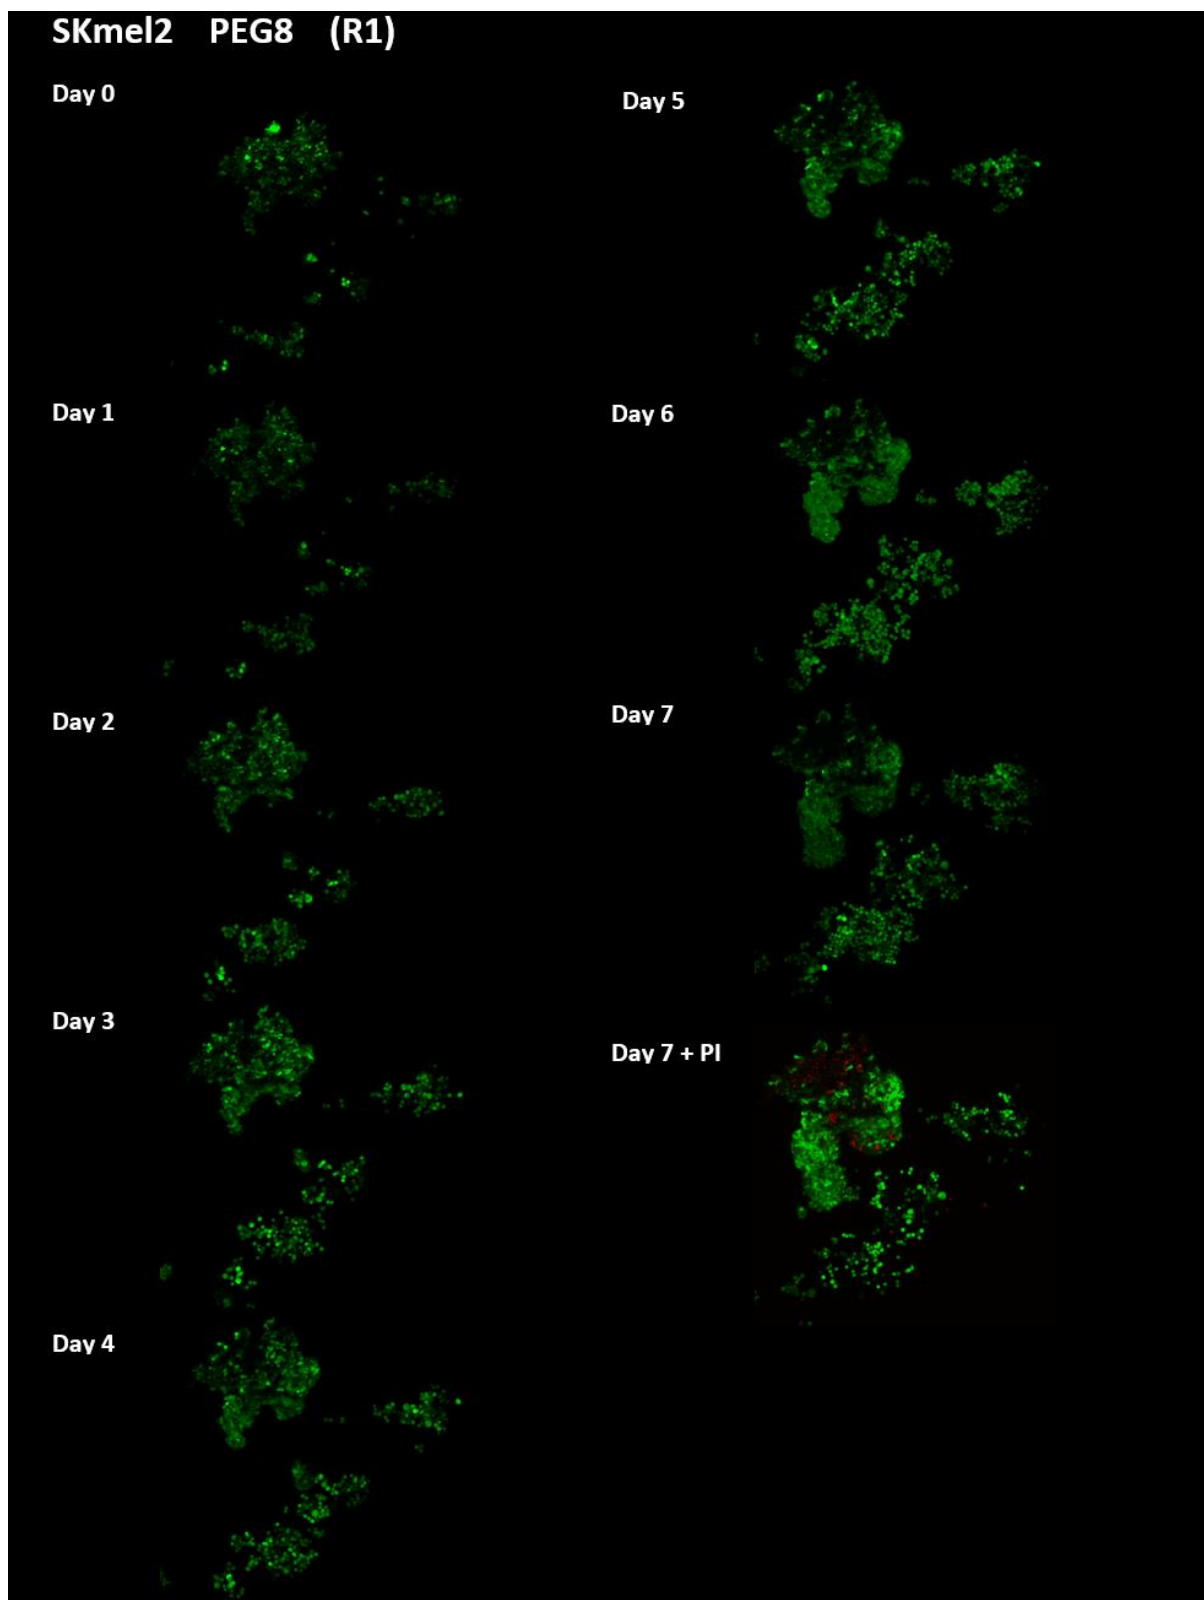

Supplement: s1 [file s1]
